# Supplementary material for: Diferrocenylpyrylium salts and electron rich bispyran from oxidative coupling of ferrocenylpyran. Example of redox systems switched by proton transfer
Source: Royal Society of Chemistry journal article supplement (doi:10.1039/c3nj41126e), 2013-01-01

## **Electronic Supplementary Information**

# DIFERROCENYLPYRYLIUM SALTS AND ELECTRON RICH BISPYRAN FROM OXIDATIVE COUPLING OF FERROCENYLPYRAN. EXAMPLE OF REDOX SYSTEMS SWITCHED BY PROTON TRANSFER

*Fatou Ba,<sup>1</sup> Nolwenn Cabon,<sup>1</sup> Pascal Le Poul,<sup>1</sup> Samia Kahlal,<sup>2</sup> Jean- Yves Saillard,<sup>2</sup> Nicolas Le Poul,<sup>3</sup> Stephane Golhen,<sup>2</sup> Bertrand Caro\*,<sup>1</sup> Françoise Robin-Le Guen<sup>1</sup>*

1) Institut Sciences Chimiques de Rennes, U.M.R. CNRS 6226, I.U.T. Lannion, B.P. 30219, rue E. Branly 22302 Lannion, France,

2) Institut Sciences Chimiques de Rennes, U.M.R. CNRS 6226, Université de Rennes 1, 263 avenue du Général Leclerc CS 74205 35042 Rennes Cedex, France

3) Laboratoire de Chimie, Electrochimie Moléculaires et Chimie Analytique, U.M.R. CNRS 6521, Université de Bretagne Occidentale, 6 avenue Victor Le Gorgeu CS 93837 29238 Brest Cedex 3, France.

E- Mail: [bertrand.caro@univ-rennes1.fr](mailto:bertrand.caro@univ-rennes1.fr)

**ESI 01:  $^1\text{H}$  NMR spectrum of  $2^{2+}$**

**ESI 02: M.O. Diagrams**

S2-a) M.O. Diagram of 1

S2-b) M.O. Diagram of  $1^+$

**ESI 03: Spin density of  $1^+$**

**ESI 04: Cartesian coordinates of the optimized geometries**

**ESI 05: Table: Selected bond lengths for 1,  $1^+$ ,  $[1-\text{H}]^+$ ,  $2^{2+}$ , 3 and  $4^{2+}$  complexes.**

**ESI 06: Compound phenylmethylenepyran [ref 19]: NMR  $^1\text{H}$ ,  $^{13}\text{C}$ , UV-Vis spectra, Cyclic Voltammetry**

**ESI 07: Voltammogram of 1 +  $\text{HBF}_4$**

**ESI 08: CIF of  $2^{2+}$**

**ESI 09: CIF of 3**

**ESI 10: UV-Vis spectrum of 1**

**ESI 11: UV-Vis and NIR spectra of  $2^{2+}$**

**ESI 12: Cyclic voltammetry of  $4^{2+}$**

**ESI 13:  $^1\text{H}$  NMR spectrum of  $4^{2+}$**

**ESI 14: CIF of  $4^{2+}$**

**ESI 15: UV-Vis spectrum of 3**

**ESI 16: UV-Vis and NIR spectra of  $4^{2+}$**

**ESI 17:  $^1\text{H}$  NMR spectra of 5**

**ESI 18: IR spectrum of 5 (KBr)**

### ESI 01: $^1\text{H}$ NMR spectrum of $2^{2+}$

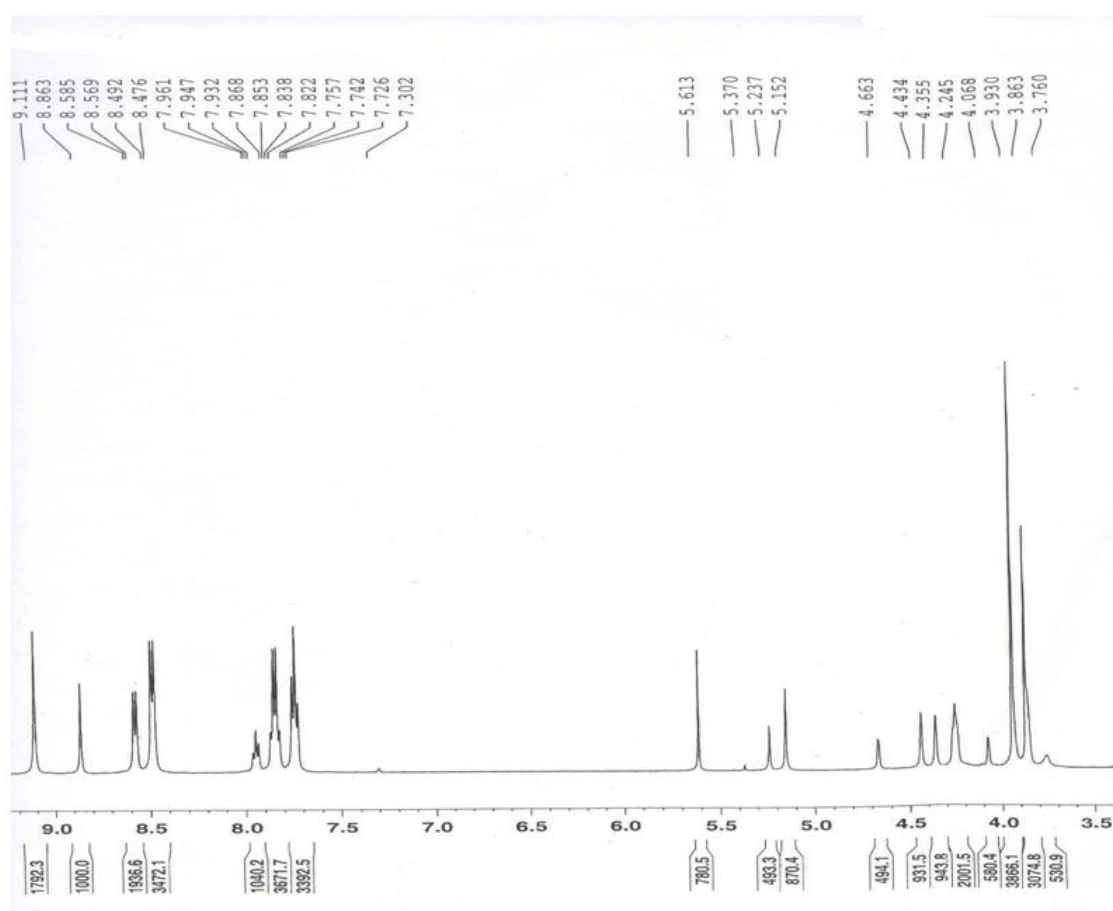

### ESI 02: M.O. Diagrams

ESI 02-a) M.O. Diagram of **1**

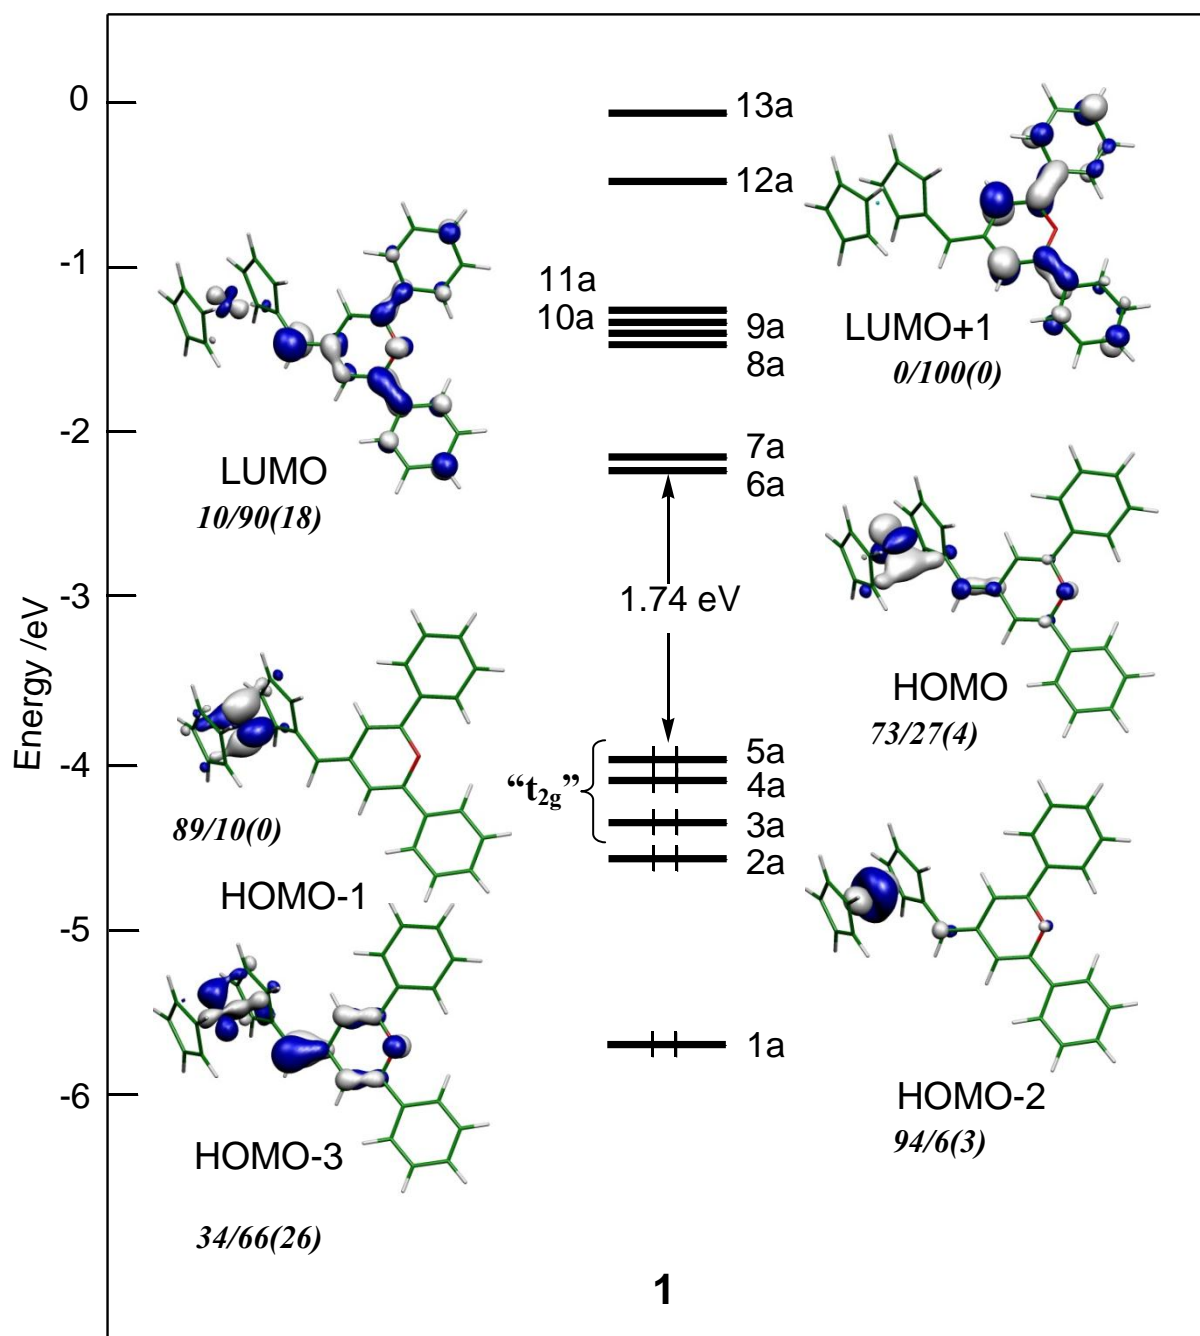

MO diagram of **1**. The numerical values indicate the MO localization in (%) in the following order: Fe/ligand(C<sub>α</sub>).

ESI 02-b) M.O. Diagram of 1<sup>+</sup>

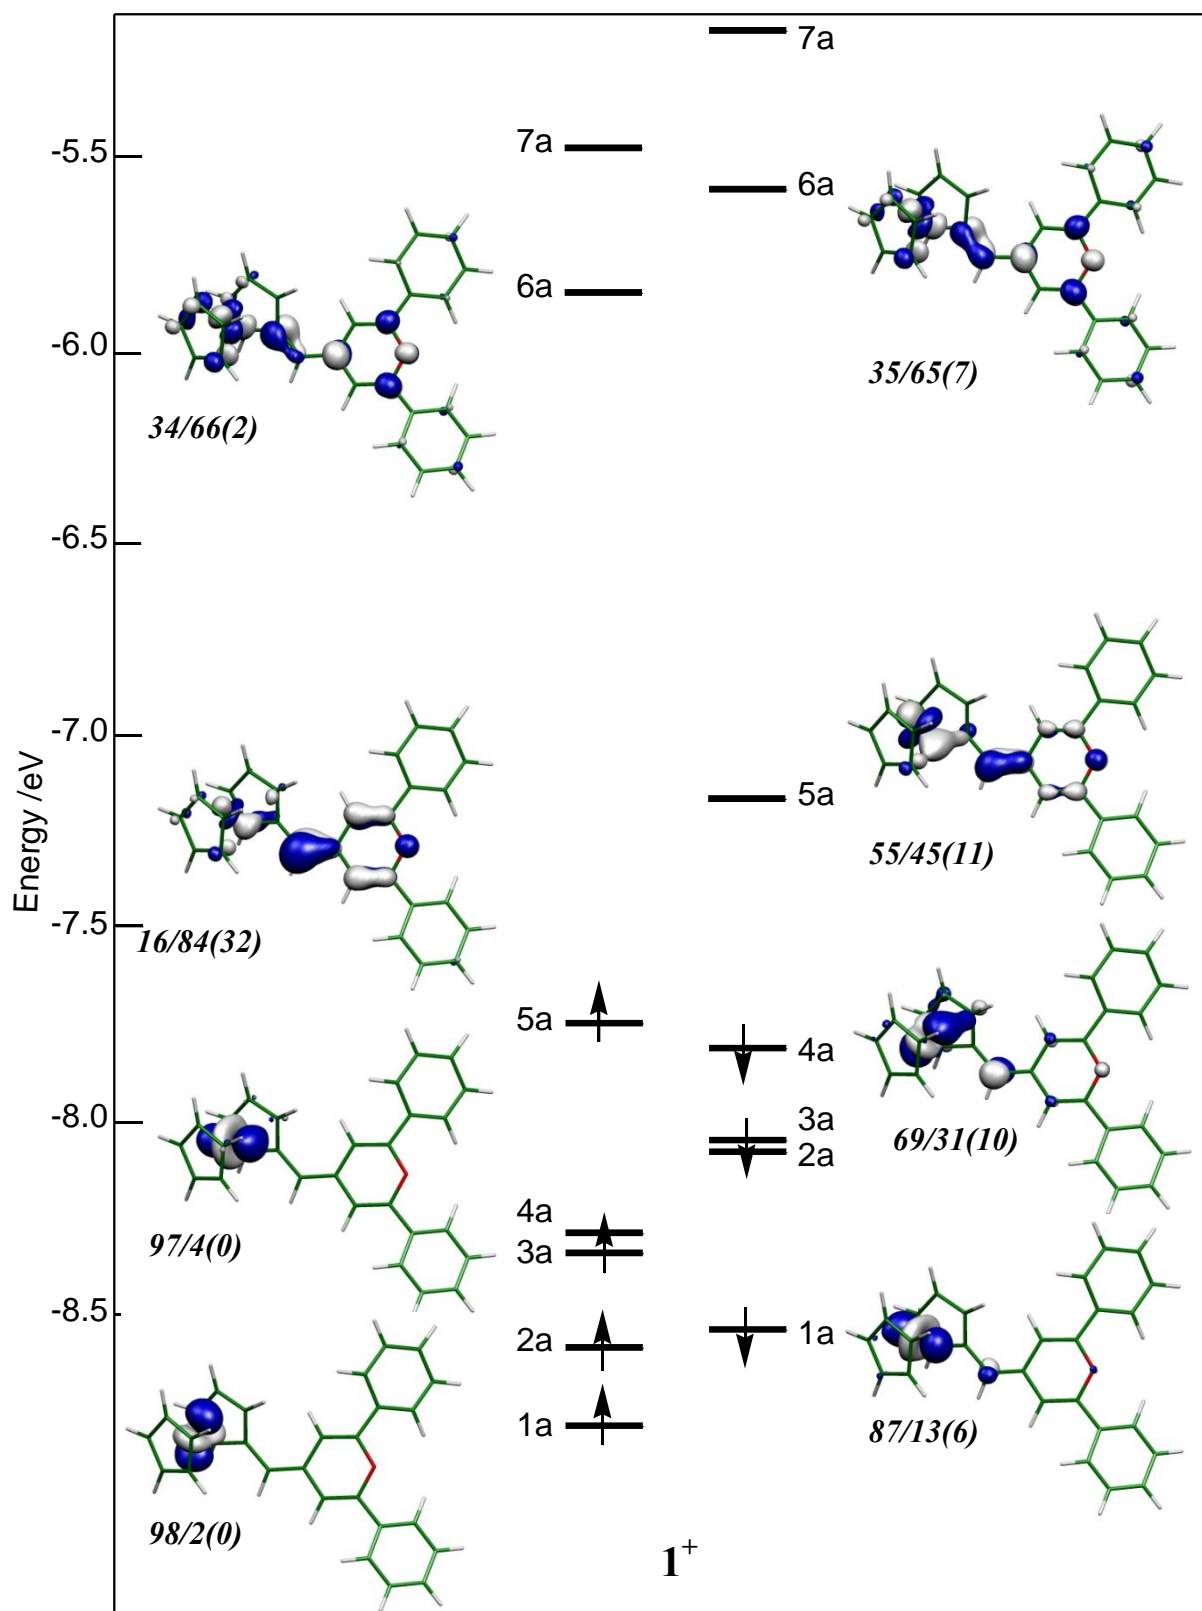

MO diagram of  $1^+$ . The numerical values indicate the MO localization in (%) in the following order: Fe/ligand( $C_2$ )

### ESI 03: Spin density of $1^{+}$ .

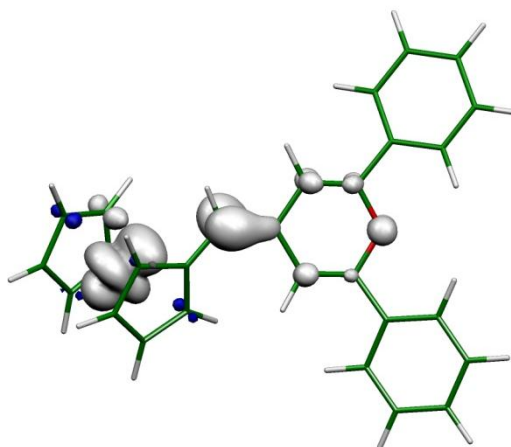

Figure : Plot of the total spin density for  $1^{+}$ . The contour value is 0.003 [ $e/\text{bohr}^3$ ].

### ESI 04: Cartesian coordinates of the optimized geometries

**1**  $C_1$

**Bonding Energy** -340.14695689 eV

| Atom | X        | Y        | Z (Angstrom) |
|------|----------|----------|--------------|
| 1.C  | 3.165370 | 9.118214 | 8.351473     |
| 2.C  | 3.342416 | 7.702605 | 8.051352     |
| 3.C  | 3.439290 | 5.180775 | 5.327330     |
| 4.H  | 3.342224 | 7.011822 | 8.898075     |
| 5.C  | 3.504624 | 5.730624 | 6.565521     |
| 6.H  | 3.606485 | 5.065421 | 7.421525     |
| 7.C  | 3.384574 | 7.157413 | 6.788336     |
| 8.C  | 3.197993 | 7.920076 | 5.570830     |
| 9.H  | 3.026013 | 8.990533 | 5.639351     |
| 10.C | 3.117245 | 7.334321 | 4.351850     |
| 11.C | 3.503602 | 3.746277 | 5.007571     |
| 12.C | 4.072986 | 2.822520 | 5.906577     |
| 13.H | 4.520904 | 3.176285 | 6.835480     |
| 14.C | 4.096891 | 1.461432 | 5.609628     |

|      |          |           |           |
|------|----------|-----------|-----------|
| 15.H | 4.548075 | 0.763856  | 6.316532  |
| 16.C | 3.561334 | 0.989820  | 4.405098  |
| 17.H | 3.583389 | -0.075926 | 4.173351  |
| 18.C | 3.007780 | 1.897671  | 3.498623  |
| 19.H | 2.589601 | 1.542424  | 2.555635  |
| 20.C | 2.981909 | 3.261505  | 3.792822  |
| 21.H | 2.543246 | 3.962763  | 3.085995  |
| 22.C | 2.829095 | 8.026682  | 3.085913  |
| 23.C | 2.953039 | 9.427322  | 2.983322  |
| 24.H | 3.316400 | 10.004074 | 3.833590  |
| 25.C | 2.628612 | 10.087713 | 1.801410  |
| 26.H | 2.731567 | 11.172294 | 1.745817  |
| 27.C | 2.180405 | 9.366818  | 0.687782  |
| 28.H | 1.924387 | 9.886613  | -0.236600 |
| 29.C | 2.071289 | 7.976545  | 0.770207  |
| 30.H | 1.726556 | 7.403965  | -0.092148 |
| 31.C | 2.395527 | 7.311002  | 1.954095  |
| 32.H | 2.301519 | 6.228631  | 2.013083  |
| 33.C | 2.260074 | 9.658758  | 9.343633  |
| 34.H | 1.632761 | 9.066988  | 10.005554 |
| 35.C | 2.288509 | 11.089004 | 9.264071  |
| 36.H | 1.702598 | 11.774280 | 9.871011  |
| 37.C | 3.240441 | 11.457998 | 8.255783  |
| 38.H | 3.512892 | 12.471300 | 7.971756  |
| 39.C | 3.788359 | 10.252386 | 7.706379  |
| 40.H | 4.567264 | 10.192039 | 6.950371  |
| 41.C | 5.683071 | 9.281401  | 10.705854 |
| 42.H | 5.954715 | 8.252621  | 10.483205 |
| 43.C | 4.700812 | 9.708793  | 11.660642 |

|       |          |           |           |
|-------|----------|-----------|-----------|
| 44.H  | 4.100918 | 9.061743  | 12.295891 |
| 45.C  | 4.642561 | 11.143053 | 11.625144 |
| 46.H  | 3.987317 | 11.771172 | 12.223769 |
| 47.C  | 5.585481 | 11.600039 | 10.645068 |
| 48.H  | 5.771868 | 12.636208 | 10.373551 |
| 49.C  | 6.227420 | 10.449140 | 10.075967 |
| 50.H  | 6.989264 | 10.460427 | 9.300670  |
| 51.O  | 3.252508 | 5.961668  | 4.192541  |
| 52.Fe | 4.162869 | 10.359825 | 9.753713  |

**[1]<sup>+</sup> S=1/2 C<sub>1</sub>**

**Bonding Energy** -334.43373602 eV

| <b>Atom</b> | <b>X</b> | <b>Y</b> | <b>Z (Angstrom)</b> |
|-------------|----------|----------|---------------------|
| 1.C         | 2.906295 | 9.125410 | 8.373447            |
| 2.C         | 3.045356 | 7.749198 | 8.030533            |
| 3.C         | 3.376964 | 5.221704 | 5.325621            |
| 4.H         | 2.883041 | 7.032135 | 8.838009            |
| 5.C         | 3.346622 | 5.792760 | 6.568832            |
| 6.H         | 3.382769 | 5.141482 | 7.439511            |
| 7.C         | 3.214156 | 7.207297 | 6.743123            |
| 8.C         | 3.114573 | 7.968097 | 5.535426            |
| 9.H         | 2.918088 | 9.034731 | 5.577517            |
| 10.C        | 3.105006 | 7.362691 | 4.307937            |
| 11.C        | 3.488526 | 3.792046 | 5.027769            |
| 12.C        | 4.043873 | 2.905754 | 5.973031            |
| 13.H        | 4.445668 | 3.287856 | 6.911626            |
| 14.C        | 4.119249 | 1.542412 | 5.700382            |
| 15.H        | 4.560729 | 0.868070 | 6.434200            |
| 16.C        | 3.642546 | 1.040493 | 4.484096            |



|      |          |           |           |
|------|----------|-----------|-----------|
| 17.H | 3.700522 | -0.027906 | 4.274006  |
| 18.C | 3.097642 | 1.912419  | 3.536354  |
| 19.H | 2.723557 | 1.525054  | 2.588446  |
| 20.C | 3.024782 | 3.278326  | 3.800639  |
| 21.H | 2.589724 | 3.951027  | 3.064261  |
| 22.C | 2.876592 | 8.027335  | 3.021696  |
| 23.C | 3.012108 | 9.426024  | 2.904614  |
| 24.H | 3.351178 | 10.018024 | 3.754443  |
| 25.C | 2.736350 | 10.064225 | 1.699091  |
| 26.H | 2.847689 | 11.145885 | 1.622127  |
| 27.C | 2.322492 | 9.320626  | 0.588032  |
| 28.H | 2.099872 | 9.823679  | -0.353561 |
| 29.C | 2.198386 | 7.931848  | 0.688344  |
| 30.H | 1.876202 | 7.348473  | -0.174376 |
| 31.C | 2.476820 | 7.287065  | 1.892055  |
| 32.H | 2.367733 | 6.207106  | 1.965951  |
| 33.C | 2.211737 | 9.605028  | 9.558095  |
| 34.H | 1.670470 | 8.976796  | 10.260297 |
| 35.C | 2.245743 | 11.033834 | 9.561083  |
| 36.H | 1.756770 | 11.678934 | 10.285358 |
| 37.C | 3.049392 | 11.461578 | 8.454928  |
| 38.H | 3.295747 | 12.488912 | 8.201434  |
| 39.C | 3.489881 | 10.298140 | 7.751039  |
| 40.H | 4.160117 | 10.296042 | 6.896391  |
| 41.C | 5.865988 | 9.272401  | 10.632817 |
| 42.H | 6.144123 | 8.242175  | 10.423299 |
| 43.C | 4.951781 | 9.702695  | 11.643866 |
| 44.H | 4.443587 | 9.066538  | 12.363578 |
| 45.C | 4.844283 | 11.131975 | 11.557169 |

|       |          |           |           |
|-------|----------|-----------|-----------|
| 46.H  | 4.238366 | 11.766410 | 12.198560 |
| 47.C  | 5.679220 | 11.572013 | 10.478947 |
| 48.H  | 5.817466 | 12.600449 | 10.156561 |
| 49.C  | 6.304183 | 10.416976 | 9.903159  |
| 50.H  | 6.997241 | 10.414830 | 9.066308  |
| 51.O  | 3.260955 | 6.002835  | 4.200118  |
| 52.Fe | 4.168123 | 10.284529 | 9.759991  |

**[1-H]<sup>+</sup>**

**C<sub>1</sub>**

**Bonding Energy** -338.26257419 eV

| <b>Atom</b> | <b>X</b> | <b>Y</b> | <b>Z (Angstrom)</b> |
|-------------|----------|----------|---------------------|
| 1.C         | 7.855205 | 6.532827 | 1.323332            |
| 2.C         | 6.588781 | 7.172890 | .793443             |
| 3.C         | 3.741737 | 4.644672 | .911557             |
| 4.C         | 4.885047 | 5.313259 | .515495             |
| 5.H         | 5.428732 | 4.958092 | -.356169            |
| 6.C         | 5.341158 | 6.440760 | 1.221007            |
| 7.C         | 4.587640 | 6.873988 | 2.320093            |
| 8.H         | 4.894283 | 7.759868 | 2.869359            |
| 9.C         | 3.454782 | 6.190034 | 2.722324            |
| 10.C        | 3.146373 | 3.473977 | .275898             |
| 11.C        | 3.646165 | 2.999751 | -.957785            |
| 12.H        | 4.471383 | 3.507650 | -1.455092           |
| 13.C        | 3.076751 | 1.887276 | -1.567940           |
| 14.H        | 3.467706 | 1.536025 | -2.522646           |
| 15.C        | 2.001069 | 1.226447 | -.963397            |
| 16.H        | 1.554117 | .357058  | -1.446496           |
| 17.C        | 1.498714 | 1.684278 | .259212             |
| 18.H        | .662993  | 1.169389 | .733025             |

|      |           |          |          |
|------|-----------|----------|----------|
| 19.C | 2.062588  | 2.797587 | .875761  |
| 20.H | 1.670192  | 3.142754 | 1.829668 |
| 21.C | 2.604582  | 6.498719 | 3.864832 |
| 22.C | 2.913282  | 7.590688 | 4.708065 |
| 23.H | 3.771448  | 8.227893 | 4.499546 |
| 24.C | 2.128115  | 7.868200 | 5.821011 |
| 25.H | 2.381955  | 8.710772 | 6.463997 |
| 26.C | 1.018929  | 7.067023 | 6.117220 |
| 27.H | .408780   | 7.283353 | 6.994565 |
| 28.C | .695240   | 5.990285 | 5.285072 |
| 29.H | -.170663  | 5.367888 | 5.510593 |
| 30.C | 1.475945  | 5.706771 | 4.167805 |
| 31.H | 1.213795  | 4.869135 | 3.525455 |
| 32.C | 8.272247  | 5.163638 | 1.165597 |
| 33.H | 7.701253  | 4.360039 | .706283  |
| 34.C | 9.596585  | 5.036990 | 1.698872 |
| 35.H | 10.186212 | 4.124318 | 1.725413 |
| 36.C | 9.991840  | 6.314532 | 2.211346 |
| 37.H | 10.934798 | 6.546885 | 2.698317 |
| 38.C | 8.916659  | 7.234207 | 1.988001 |
| 39.H | 8.908995  | 8.288150 | 2.256886 |
| 40.C | 6.950783  | 6.058561 | 4.769992 |
| 41.H | 6.198533  | 6.841872 | 4.792933 |
| 42.C | 6.762915  | 4.709808 | 4.315452 |
| 43.H | 5.846220  | 4.283000 | 3.915923 |
| 44.C | 7.995675  | 4.007319 | 4.502492 |
| 45.H | 8.184462  | 2.968006 | 4.245632 |
| 46.C | 8.943564  | 4.919008 | 5.069650 |
| 47.H | 9.978405  | 4.693025 | 5.313195 |

|       |          |          |          |
|-------|----------|----------|----------|
| 48.C  | 8.299267 | 6.186606 | 5.235162 |
| 49.H  | 8.756585 | 7.088272 | 5.634306 |
| 50.O  | 3.060723 | 5.087043 | 2.010767 |
| 51.Fe | 8.291672 | 5.636518 | 3.206556 |
| 52.H  | 6.538351 | 8.209726 | 1.149591 |
| 53.H  | 6.630204 | 7.214936 | -3.06913 |

**2<sup>2+</sup>**            **C<sub>i</sub>**

**Bonding Energy**    -667.37639304 eV

| <b>Atom</b> | <b>X</b>  | <b>Y</b>  | <b>Z (Angstrom)</b> |
|-------------|-----------|-----------|---------------------|
| 1.C         | .643167   | -1.709059 | -.691845            |
| 2.C         | -.318374  | -.721276  | -.063214            |
| 3.C         | -3.082215 | -.011661  | -2.620487           |
| 4.C         | -1.833262 | -.084072  | -2.031009           |
| 5.H         | -.991804  | .361209   | -2.553150           |
| 6.C         | -1.664096 | -.679431  | -.767487            |
| 7.C         | -2.802742 | -1.202197 | -.137517            |
| 8.H         | -2.717521 | -1.669008 | .840283             |
| 9.C         | -4.049464 | -1.134114 | -.736625            |
| 10.C        | -3.419510 | .616922   | -3.892862           |
| 11.C        | -2.404966 | 1.136024  | -4.729175           |
| 12.H        | -1.355889 | 1.053823  | -4.446940           |
| 13.C        | -2.728885 | 1.749891  | -5.934215           |
| 14.H        | -1.937492 | 2.144774  | -6.571010           |
| 15.C        | -4.067119 | 1.856831  | -6.332222           |
| 16.H        | -4.318119 | 2.337398  | -7.278243           |
| 17.C        | -5.080916 | 1.345587  | -5.515351           |
| 18.H        | -6.123383 | 1.428316  | -5.822533           |
| 19.C        | -4.764496 | .732296   | -4.306421           |

|      |           |           |           |
|------|-----------|-----------|-----------|
| 20.H | -5.561096 | .348624   | -3.673350 |
| 21.C | -5.310446 | -1.628947 | -.202538  |
| 22.C | -5.370169 | -2.175716 | 1.100308  |
| 23.H | -4.479042 | -2.221852 | 1.724786  |
| 24.C | -6.572611 | -2.651139 | 1.610715  |
| 25.H | -6.606139 | -3.068241 | 2.616971  |
| 26.C | -7.738170 | -2.591615 | .837046   |
| 27.H | -8.679769 | -2.965290 | 1.240304  |
| 28.C | -7.693526 | -2.052297 | -.453294  |
| 29.H | -8.599435 | -2.007370 | -1.057553 |
| 30.C | -6.493788 | -1.574564 | -.971709  |
| 31.H | -6.468081 | -1.165841 | -1.979213 |
| 32.C | 1.402379  | -2.677225 | .059262   |
| 33.H | 1.292850  | -2.885773 | 1.121596  |
| 34.C | 2.326128  | -3.317271 | -.827287  |
| 35.H | 3.030910  | -4.098182 | -.555131  |
| 36.C | 2.136674  | -2.767631 | -2.135905 |
| 37.H | 2.674838  | -3.055487 | -3.034976 |
| 38.C | 1.093613  | -1.784523 | -2.061971 |
| 39.H | .724658   | -1.207804 | -2.907032 |
| 40.C | -1.133307 | -4.897290 | -.695101  |
| 41.H | -1.547861 | -4.850084 | .308887   |
| 42.C | -1.627777 | -4.209850 | -1.852240 |
| 43.H | -2.486778 | -3.544892 | -1.883636 |
| 44.C | -.804531  | -4.562711 | -2.966933 |
| 45.H | -.917401  | -4.203506 | -3.986551 |
| 46.C | .198163   | -5.473518 | -2.503215 |
| 47.H | .982702   | -5.922151 | -3.107029 |
| 48.C | -.004771  | -5.682126 | -1.099844 |

|       |           |           |           |
|-------|-----------|-----------|-----------|
| 49.H  | .595665   | -6.318967 | -.455373  |
| 50.O  | -4.156464 | -.544209  | -1.965684 |
| 51.Fe | .374718   | -3.659085 | -1.467439 |
| 52.H  | -.519097  | -1.070782 | .959096   |
| 53.C  | -.643167  | 1.709059  | .691845   |
| 54.C  | .318374   | .721276   | .063214   |
| 55.C  | 3.082215  | .011661   | 2.620487  |
| 56.C  | 1.833262  | .084072   | 2.031009  |
| 57.H  | .991804   | -.361209  | 2.553150  |
| 58.C  | 1.664096  | .679431   | .767487   |
| 59.C  | 2.802742  | 1.202197  | .137517   |
| 60.H  | 2.717521  | 1.669008  | -.840283  |
| 61.C  | 4.049464  | 1.134114  | .736625   |
| 62.C  | 3.419510  | -.616922  | 3.892862  |
| 63.C  | 2.404966  | -1.136024 | 4.729175  |
| 64.H  | 1.355889  | -1.053823 | 4.446940  |
| 65.C  | 2.728885  | -1.749891 | 5.934215  |
| 66.H  | 1.937492  | -2.144774 | 6.571010  |
| 67.C  | 4.067119  | -1.856831 | 6.332222  |
| 68.H  | 4.318119  | -2.337398 | 7.278243  |
| 69.C  | 5.080916  | -1.345587 | 5.515351  |
| 70.H  | 6.123383  | -1.428316 | 5.822533  |
| 71.C  | 4.764496  | -.732296  | 4.306421  |
| 72.H  | 5.561096  | -.348624  | 3.673350  |
| 73.C  | 5.310446  | 1.628947  | .202538   |
| 74.C  | 5.370169  | 2.175716  | -1.100308 |
| 75.H  | 4.479042  | 2.221852  | -1.724786 |
| 76.C  | 6.572611  | 2.651139  | -1.610715 |
| 77.H  | 6.606139  | 3.068241  | -2.616971 |

|        |           |          |           |
|--------|-----------|----------|-----------|
| 78.C   | 7.738170  | 2.591615 | -.837046  |
| 79.H   | 8.679769  | 2.965290 | -1.240304 |
| 80.C   | 7.693526  | 2.052297 | .453294   |
| 81.H   | 8.599435  | 2.007370 | 1.057553  |
| 82.C   | 6.493788  | 1.574564 | .971709   |
| 83.H   | 6.468081  | 1.165841 | 1.979213  |
| 84.C   | -1.402379 | 2.677225 | -.059262  |
| 85.H   | -1.292850 | 2.885773 | -1.121596 |
| 86.C   | -2.326128 | 3.317271 | .827287   |
| 87.H   | -3.030910 | 4.098182 | .555131   |
| 88.C   | -2.136674 | 2.767631 | 2.135905  |
| 89.H   | -2.674838 | 3.055487 | 3.034976  |
| 90.C   | -1.093613 | 1.784523 | 2.061971  |
| 91.H   | -.724658  | 1.207804 | 2.907032  |
| 92.C   | 1.133307  | 4.897290 | .695101   |
| 93.H   | 1.547861  | 4.850084 | -.308887  |
| 94.C   | 1.627777  | 4.209850 | 1.852240  |
| 95.H   | 2.486778  | 3.544892 | 1.883636  |
| 96.C   | .804531   | 4.562711 | 2.966933  |
| 97.H   | .917401   | 4.203506 | 3.986551  |
| 98.C   | -.198163  | 5.473518 | 2.503215  |
| 99.H   | -.982702  | 5.922151 | 3.107029  |
| 100.C  | .004771   | 5.682126 | 1.099844  |
| 101.H  | -.595665  | 6.318967 | .455373   |
| 102.O  | 4.156464  | .544209  | 1.965684  |
| 103.Fe | -.374718  | 3.659085 | 1.467439  |
| 104.H  | .519097   | 1.070782 | -.959096  |

**3**            **C<sub>1</sub>**

**Bonding Energy** -672.82466874 eV

| <b>Atom</b> | <b>X</b>  | <b>Y</b>  | <b>Z (Angstrom)</b> |
|-------------|-----------|-----------|---------------------|
| 1.C         | -1.318309 | -1.555461 | -6.969461           |
| 2.C         | .909686   | -.611111  | -7.647383           |
| 3.C         | 1.782805  | -1.575938 | -6.969540           |
| 4.C         | -.435944  | -1.108242 | -8.056706           |
| 5.Fe        | 3.589883  | -2.507000 | -7.605555           |
| 6.O         | 1.837703  | 3.515152  | -8.106834           |
| 7.C         | 2.830945  | 2.603046  | -7.794210           |
| 8.C         | 2.568792  | 1.276181  | -7.667088           |
| 9.H         | 3.401309  | .602507   | -7.487248           |
| 10.C        | 1.242413  | .727192   | -7.849756           |
| 11.C        | .263877   | 1.713036  | -8.248040           |
| 12.H        | -.763377  | 1.392693  | -8.401885           |
| 13.C        | .555097   | 3.034757  | -8.351567           |
| 14.C        | 4.147119  | 3.242799  | -7.645972           |
| 15.C        | 5.214139  | 2.573806  | -7.011946           |
| 16.H        | 5.061364  | 1.575494  | -6.601857           |
| 17.C        | 6.459035  | 3.183832  | -6.877299           |
| 18.H        | 7.269225  | 2.650360  | -6.378138           |
| 19.C        | 6.668180  | 4.480511  | -7.363152           |
| 20.H        | 7.641997  | 4.959184  | -7.250392           |
| 21.C        | 5.616299  | 5.157401  | -7.985714           |
| 22.H        | 5.767081  | 6.168299  | -8.367854           |
| 23.C        | 4.368102  | 4.548339  | -8.126145           |
| 24.H        | 3.554799  | 5.076254  | -8.620852           |
| 25.C        | -.396698  | 4.112915  | -8.651435           |
| 26.C        | -1.662309 | 3.831199  | -9.205385           |
| 27.H        | -1.923929 | 2.805775  | -9.462676           |



|       |           |           |            |
|-------|-----------|-----------|------------|
| 28.C  | -2.578417 | 4.850977  | -9.447857  |
| 29.H  | -3.552992 | 4.607586  | -9.872861  |
| 30.C  | -2.250786 | 6.181033  | -9.156616  |
| 31.H  | -2.969927 | 6.978760  | -9.348295  |
| 32.C  | -.993572  | 6.476120  | -8.623342  |
| 33.H  | -.726136  | 7.508789  | -8.393717  |
| 34.C  | -.073947  | 5.455824  | -8.372735  |
| 35.H  | .897602   | 5.690861  | -7.941817  |
| 36.C  | 1.637027  | -3.011480 | -7.079944  |
| 37.H  | .918842   | -3.511931 | -7.724530  |
| 38.C  | 2.569046  | -3.649162 | -6.204405  |
| 39.H  | 2.688852  | -4.720963 | -6.071078  |
| 40.C  | 3.327493  | -2.624841 | -5.548997  |
| 41.H  | 4.120708  | -2.777995 | -4.821404  |
| 42.C  | 2.862369  | -1.357018 | -6.023798  |
| 43.H  | 3.217539  | -.394201  | -5.671026  |
| 44.C  | 4.157897  | -1.792161 | -9.492991  |
| 45.H  | 3.640761  | -1.027068 | -10.066038 |
| 46.C  | 3.914586  | -3.205165 | -9.542960  |
| 47.H  | 3.170219  | -3.710531 | -10.153696 |
| 48.C  | 4.819944  | -3.842628 | -8.628515  |
| 49.H  | 4.880581  | -4.910138 | -8.431031  |
| 50.C  | 5.617154  | -2.823195 | -8.009739  |
| 51.H  | 6.392607  | -2.982589 | -7.264541  |
| 52.C  | 5.205731  | -1.555539 | -8.542724  |
| 53.H  | 5.628025  | -.586742  | -8.289223  |
| 54.Fe | -3.176521 | -.794917  | -6.256698  |
| 55.O  | -1.452868 | -1.083295 | -12.192801 |
| 56.C  | -2.416714 | -1.328873 | -11.228515 |

|      |           |           |            |
|------|-----------|-----------|------------|
| 57.C | -2.115717 | -1.383027 | -9.904478  |
| 58.H | -2.931096 | -1.513189 | -9.198476  |
| 59.C | -.775518  | -1.155990 | -9.404962  |
| 60.C | .201008   | -.964048  | -10.456269 |
| 61.H | 1.246575  | -.830208  | -10.188408 |
| 62.C | -.131497  | -.967311  | -11.769922 |
| 63.C | -3.758453 | -1.492859 | -11.812100 |
| 64.C | -4.774922 | -2.169247 | -11.109544 |
| 65.H | -4.558090 | -2.605819 | -10.134259 |
| 66.C | -6.043855 | -2.320423 | -11.663192 |
| 67.H | -6.813877 | -2.859524 | -11.109409 |
| 68.C | -6.327565 | -1.803670 | -12.933712 |
| 69.H | -7.319698 | -1.928198 | -13.368956 |
| 70.C | -5.323168 | -1.139418 | -13.644499 |
| 71.H | -5.531787 | -.736837  | -14.636690 |
| 72.C | -4.049457 | -.989664  | -13.093800 |
| 73.H | -3.269135 | -.477197  | -13.653920 |
| 74.C | .810437   | -.867543  | -12.896566 |
| 75.C | .469383   | -.169018  | -14.069006 |
| 76.H | -.502148  | .320473   | -14.136671 |
| 77.C | 1.373345  | -.080601  | -15.128309 |
| 78.H | 1.102008  | .478410   | -16.024952 |
| 79.C | 2.624614  | -.701953  | -15.043934 |
| 80.H | 3.324473  | -.642947  | -15.878490 |
| 81.C | 2.967621  | -1.408861 | -13.886297 |
| 82.H | 3.931161  | -1.915613 | -13.818340 |
| 83.C | 2.069790  | -1.490153 | -12.823054 |
| 84.H | 2.327408  | -2.070895 | -11.937941 |
| 85.C | -1.215314 | -1.090944 | -5.604307  |

|       |           |           |           |
|-------|-----------|-----------|-----------|
| 86.H  | -5.538730 | -3.309450 | -5.266220 |
| 87.C  | -2.130791 | -1.822577 | -4.787526 |
| 88.H  | -2.277551 | -1.692589 | -3.718441 |
| 89.C  | -2.835344 | -2.742624 | -5.631969 |
| 90.H  | -3.603542 | -3.444441 | -5.316857 |
| 91.C  | -2.354301 | -2.571603 | -6.970793 |
| 92.H  | -2.669173 | -3.159302 | -7.827960 |
| 93.C  | -3.893640 | .732772   | -7.504031 |
| 94.H  | -3.453163 | 1.038524  | -8.448992 |
| 95.C  | -3.572419 | 1.257814  | -6.209754 |
| 96.H  | -2.841617 | 2.034161  | -5.998089 |
| 97.C  | -4.381846 | .572879   | -5.243065 |
| 98.H  | -4.368800 | .738662   | -4.168558 |
| 99.C  | -5.198349 | -.379815  | -5.939454 |
| 100.H | -5.915680 | -1.059558 | -5.486447 |
| 101.C | -4.893777 | -.282521  | -7.339131 |
| 102.H | -5.353117 | -.862761  | -8.135049 |

$4^{2+}$   $C_i$

**Bonding Energy** -659.51152917 eV

| <b>Atom</b> | <b>X</b> | <b>Y</b> | <b>Z (Angstrom)</b> |
|-------------|----------|----------|---------------------|
| 1.C         | 2.941761 | 1.749391 | -2.527561           |
| 2.C         | 2.111803 | .773861  | -2.001463           |
| 3.H         | 1.880044 | -.100577 | -2.604176           |
| 4.C         | 1.527166 | .934587  | -.732962            |
| 5.C         | 1.819765 | 2.106572 | -.019213            |
| 6.H         | 1.389666 | 2.259384 | .966889             |
| 7.C         | 2.708868 | 3.039987 | -.521530            |

|      |          |           |           |
|------|----------|-----------|-----------|
| 8.C  | .665586  | -.120545  | -.117220  |
| 9.C  | 1.379104 | -1.343070 | .305690   |
| 10.C | 2.466922 | -2.006243 | -.387219  |
| 11.H | 2.914980 | -1.708865 | -1.330939 |
| 12.C | 2.838011 | -3.171372 | .358952   |
| 13.H | 3.610990 | -3.881420 | .080264   |
| 14.C | 2.033094 | -3.220116 | 1.541230  |
| 15.H | 2.091216 | -3.966972 | 2.327730  |
| 16.C | 1.156094 | -2.089967 | 1.527365  |
| 17.H | .450274  | -1.837444 | 2.314292  |
| 18.C | 3.820799 | .357540   | 2.346561  |
| 19.H | 3.320317 | 1.321255  | 2.302093  |
| 20.C | 3.651594 | -.622375  | 3.372899  |
| 21.H | 2.995192 | -.544209  | 4.235053  |
| 22.C | 4.513658 | -1.726145 | 3.070009  |
| 23.H | 4.619018 | -2.634881 | 3.659724  |
| 24.C | 5.210723 | -1.428020 | 1.854092  |
| 25.H | 5.935172 | -2.068370 | 1.359867  |
| 26.C | 4.776438 | -.140868  | 1.401432  |
| 27.H | 5.134767 | .372790   | .511314   |
| 28.C | 3.205430 | 4.230052  | .155602   |
| 29.C | 2.609832 | 4.664953  | 1.360902  |
| 30.H | 1.744024 | 4.145209  | 1.770579  |
| 31.C | 4.304812 | 4.949119  | -.360863  |
| 32.H | 4.783685 | 4.622365  | -1.281649 |
| 33.C | 3.545274 | 1.768876  | -3.854008 |
| 34.C | 3.265019 | .741562   | -4.784618 |
| 35.H | 2.600698 | -.080673  | -4.522257 |
| 36.C | 4.402864 | 2.822492  | -4.240998 |

|       |           |           |           |
|-------|-----------|-----------|-----------|
| 37.H  | 4.624337  | 3.625659  | -3.542292 |
| 38.C  | 4.962654  | 2.843174  | -5.514449 |
| 39.H  | 5.624179  | 3.660538  | -5.800774 |
| 40.C  | 3.107352  | 5.778348  | 2.028817  |
| 41.H  | 2.638946  | 6.107201  | 2.957018  |
| 42.C  | 4.203249  | 6.479112  | 1.510963  |
| 43.H  | 4.593909  | 7.348595  | 2.039700  |
| 44.C  | 4.796461  | 6.062149  | .314384   |
| 45.H  | 5.651689  | 6.605581  | -.089215  |
| 46.C  | 4.674939  | 1.821469  | -6.426483 |
| 47.H  | 5.111366  | 1.843314  | -7.425719 |
| 48.C  | 3.824369  | .772706   | -6.056899 |
| 49.H  | 3.595640  | -.020900  | -6.768334 |
| 50.Fe | 3.145588  | -1.467155 | 1.506269  |
| 51.O  | 3.240920  | 2.841351  | -1.767096 |
| 52.C  | -2.941761 | -1.749391 | 2.527561  |
| 53.C  | -2.111803 | -.773861  | 2.001463  |
| 54.H  | -1.880044 | .100577   | 2.604176  |
| 55.C  | -1.527166 | -.934587  | .732962   |
| 56.C  | -1.819765 | -2.106572 | .019213   |
| 57.H  | -1.389666 | -2.259384 | -.966889  |
| 58.C  | -2.708868 | -3.039987 | .521530   |
| 59.C  | -.665586  | .120545   | .117220   |
| 60.C  | -1.379104 | 1.343070  | -.305690  |
| 61.C  | -2.466922 | 2.006243  | .387219   |
| 62.H  | -2.914980 | 1.708865  | 1.330939  |
| 63.C  | -2.838011 | 3.171372  | -.358952  |
| 64.H  | -3.610990 | 3.881420  | -.080264  |
| 65.C  | -2.033094 | 3.220116  | -1.541230 |

|      |           |           |           |
|------|-----------|-----------|-----------|
| 66.H | -2.091216 | 3.966972  | -2.327730 |
| 67.C | -1.156094 | 2.089967  | -1.527365 |
| 68.H | -.450274  | 1.837444  | -2.314292 |
| 69.C | -3.820799 | -.357540  | -2.346561 |
| 70.H | -3.320317 | -1.321255 | -2.302093 |
| 71.C | -3.651594 | .622375   | -3.372899 |
| 72.H | -2.995192 | .544209   | -4.235053 |
| 73.C | -4.513658 | 1.726145  | -3.070009 |
| 74.H | -4.619018 | 2.634881  | -3.659724 |
| 75.C | -5.210723 | 1.428020  | -1.854092 |
| 76.H | -5.935172 | 2.068370  | -1.359867 |
| 77.C | -4.776438 | .140868   | -1.401432 |
| 78.H | -5.134767 | -.372790  | -.511314  |
| 79.C | -3.205430 | -4.230052 | -.155602  |
| 80.C | -2.609832 | -4.664953 | -1.360902 |
| 81.H | -1.744024 | -4.145209 | -1.770579 |
| 82.C | -4.304812 | -4.949119 | .360863   |
| 83.H | -4.783685 | -4.622365 | 1.281649  |
| 84.C | -3.545274 | -1.768876 | 3.854008  |
| 85.C | -3.265019 | -.741562  | 4.784618  |
| 86.H | -2.600698 | .080673   | 4.522257  |
| 87.C | -4.402864 | -2.822492 | 4.240998  |
| 88.H | -4.624337 | -3.625659 | 3.542292  |
| 89.C | -4.962654 | -2.843174 | 5.514449  |
| 90.H | -5.624179 | -3.660538 | 5.800774  |
| 91.C | -3.107352 | -5.778348 | -2.028817 |
| 92.H | -2.638946 | -6.107201 | -2.957018 |
| 93.C | -4.203249 | -6.479112 | -1.510963 |
| 94.H | -4.593909 | -7.348595 | -2.039700 |

|        |           |           |           |
|--------|-----------|-----------|-----------|
| 95.C   | -4.796461 | -6.062149 | -.314384  |
| 96.H   | -5.651689 | -6.605581 | .089215   |
| 97.C   | -4.674939 | -1.821469 | 6.426483  |
| 98.H   | -5.111366 | -1.843314 | 7.425719  |
| 99.C   | -3.824369 | -.772706  | 6.056899  |
| 100.H  | -3.595640 | .020900   | 6.768334  |
| 101.Fe | -3.145588 | 1.467155  | -1.506269 |
| 102.O  | -3.240920 | -2.841351 | 1.767096  |

**ESI 05: Table: Selected bond lengths for 1, 1<sup>+</sup>, [1-H]<sup>+</sup>, 2<sup>2+</sup>, 3 and 4<sup>2+</sup> complexes.**  
 Experimental values are in brackets.

|                    | 1<br><i>C<sub>i</sub></i>    | 1 <sup>+</sup><br><i>C<sub>i</sub></i> | [1-H] <sup>+</sup><br><i>C<sub>i</sub></i> | 2 <sup>2+</sup><br><i>C<sub>i</sub></i> | 3<br><i>C<sub>i</sub></i>    | 4 <sup>2+</sup><br><i>C<sub>i</sub></i> |                              |
|--------------------|------------------------------|----------------------------------------|--------------------------------------------|-----------------------------------------|------------------------------|-----------------------------------------|------------------------------|
| HOMO-LUMO gap (eV) | 1.74                         |                                        | 0.23                                       | 0.23                                    | 1.33                         | 0.24                                    |                              |
| C2-C2' (Å)         |                              |                                        |                                            | 1.582 [1.532]                           | <sup>a</sup> 1.494 [1.514]   | 1.373 [1.268]                           |                              |
| C2-C3 (Å)          | 1.458 [1.486]                | 1.425                                  | 1.515                                      | 1.515 [1.509]                           | 1.469 [1.469]                | 1.477 [1.516]                           |                              |
| C2-C4' (Å)         | 1.376 [1.384]                | 1.407                                  | 1.508                                      | 1.519 [1.534]                           | 1.394 [1.361]                | 1.495 [1.507]                           |                              |
| C4'-C5' (Å)        | 1.449 [1.445]                | 1.431                                  | 1.406                                      | 1.407 [1.390]                           | 1.448 [1.464]                | 1.406 [1.461]                           |                              |
| C5'-C6' (Å)        | 1.355 [1.337]                | 1.431                                  | 1.382                                      | 1.383 [1.386]                           | 1.358 [1.333]                | 1.385 [1.363]                           |                              |
| C6'-O1' (Å)        | 1.388 [1.374]                | 1.375                                  | 1.367                                      | 1.366 [1.336]                           | 1.385 [1.368]                | 1.388 [1.378]                           |                              |
| O1'-C2' (Å)        | 1.390 [1.365]                | 1.373                                  | 1.370                                      | 1.368 [1.341]                           | 1.392 [1.391]                | 1.369 [1.358]                           |                              |
| C2'-C3' (Å)        | 1.356 [1.342]                | 1.369                                  | 1.383                                      | 1.385 [1.383]                           | 1.357 [1.343]                | 1.384 [1.383]                           |                              |
| C3'-C4' (Å)        | 1.449 [1.440]                | 1.431                                  | 1.401                                      | 1.403 [1.382]                           | 1.437 [1.451]                | 1.403 [1.418]                           |                              |
| Fe-C(Cp') (Å)      |                              |                                        |                                            |                                         |                              |                                         |                              |
| range              | 2.069-2.122<br>[2.025-2.066] | 2.073-2.204                            | 2.082-2.131                                | 2.082-2.115<br>[2.009-2.053]            | 2.075-2.132<br>[2.025-2.067] | 2.074-2.133<br>[2.034-2.067]            | 2.076-2.139<br>[2.012-2.055] |
| average            | 2.084 [2.040]                | 2.112                                  | 2.099                                      | 2.092 [2.032]                           |                              |                                         |                              |
| Fe-C(Cp) (Å)       |                              |                                        |                                            |                                         |                              |                                         |                              |
| range              | 2.087-2.093<br>[2.028-2.046] | 2.099-2.161                            |                                            | 1.984-2.011]                            | 2.083-2.099                  | 2.084-2.101                             | 2.094-2.119<br>[2.036-2.106] |
| average            | 2.088 [2.038]                | 2.128                                  |                                            |                                         |                              |                                         |                              |

<sup>a</sup>C(2)-C(2') distance.

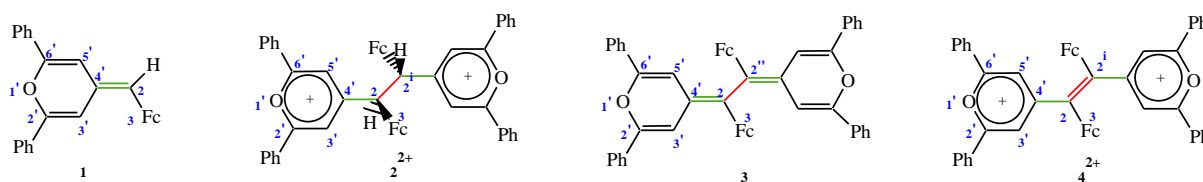

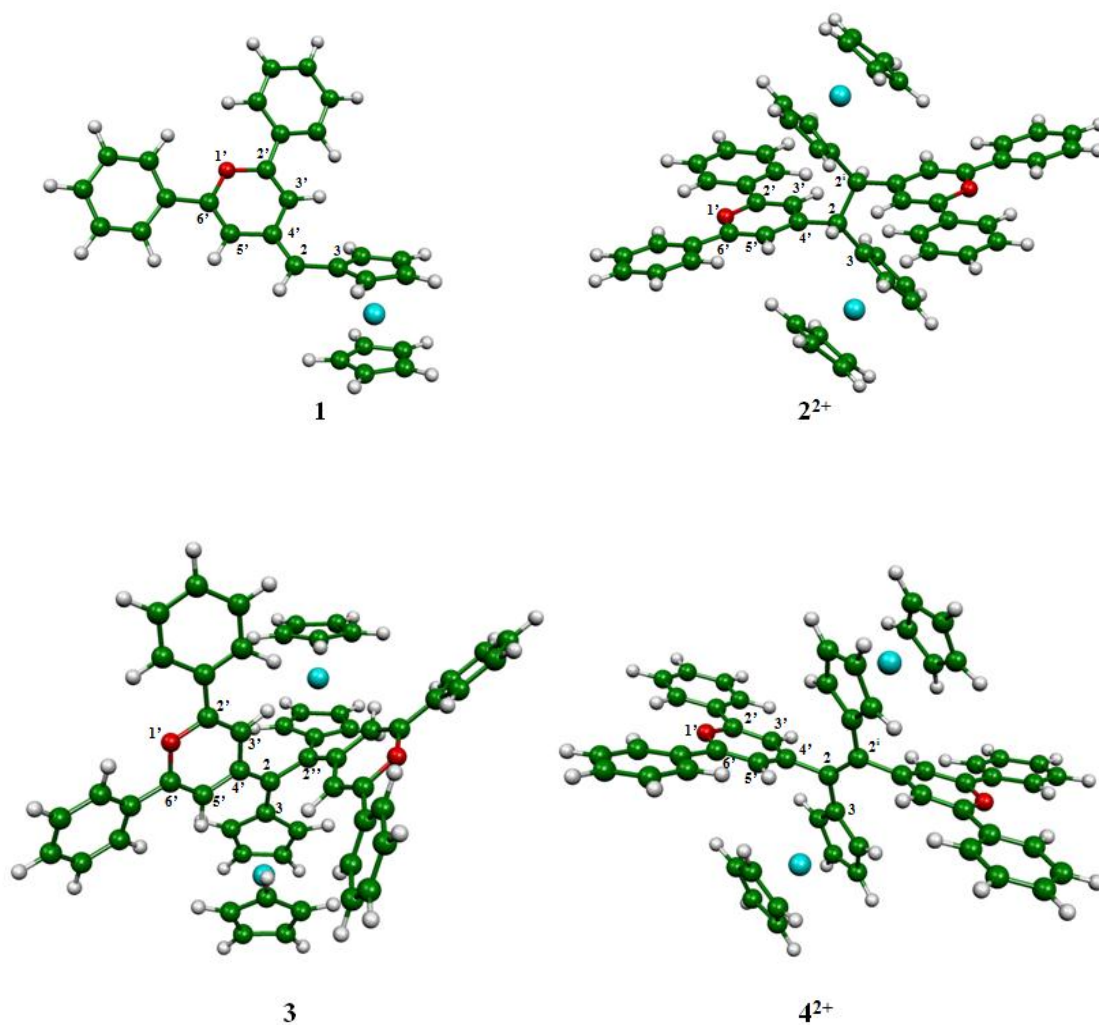

**ESI 06: Compound phenylmethylenepyran [ref 19] : NMR <sup>1</sup>H, <sup>13</sup>C, UV-Vis spectra,  
Cyclic Voltammetry**

**NMR <sup>1</sup>H** (CDCl<sub>3</sub>, 500 MHz, RT) of phenylmethylenepyran



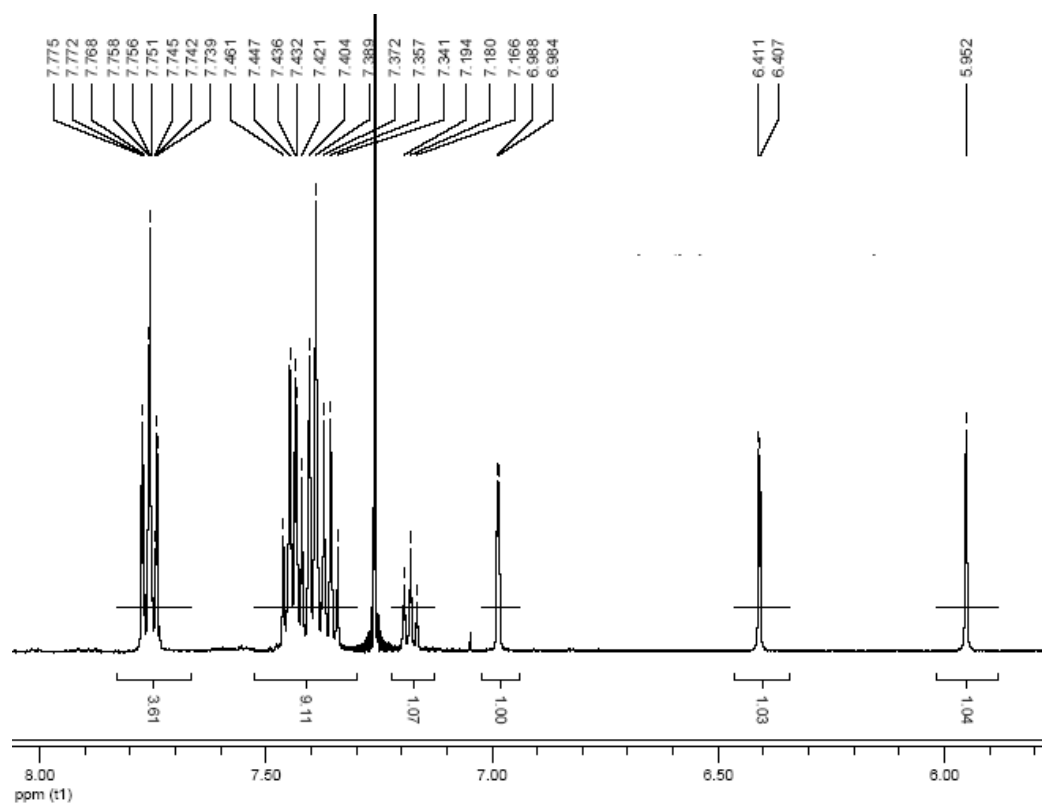

NMR <sup>13</sup>C (CDCl<sub>3</sub>, 125 MHz, JMOD sequence, RT) of phenylmethylenepyran

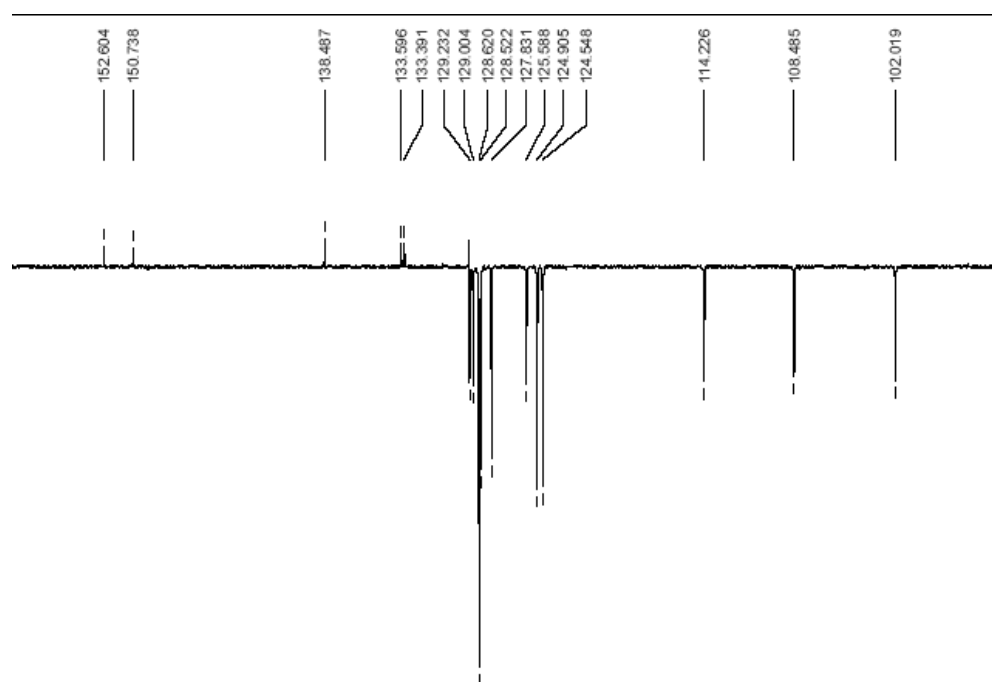

UV-vis spectrum of phenylmethylenepyran (CH<sub>2</sub>Cl<sub>2</sub>, 6.6 10<sup>-5</sup> M, RT)

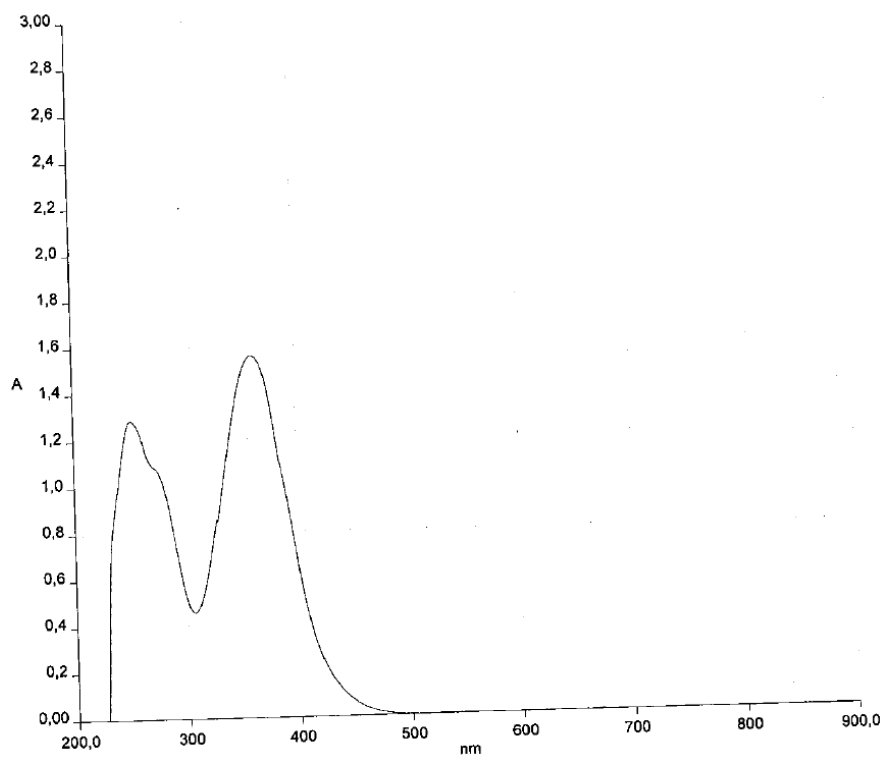

Cyclic Voltammetry of phenylmethylenepyran ( $C = 7.5 \cdot 10^{-4} \text{ mol L}^{-1}$ ), in  $\text{CH}_2\text{Cl}_2\text{-Bu}_4\text{NBF}_4$  (0.2 M) at a Pt electrode,  $\nu = 0.1 \text{ V s}^{-1}$ ,  $E/V$  vs Fc

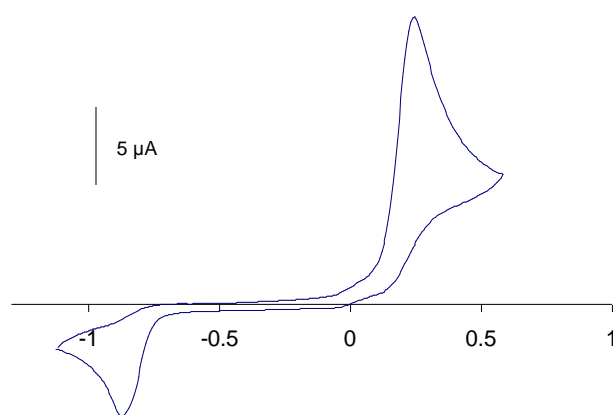

**ESI 07: Voltammogram of 1 + HBF<sub>4</sub>**

Cyclic Voltammetry of **1** ( $7.2 \cdot 10^{-3}$  M) + 1 eq of HBF<sub>4</sub>, Et<sub>2</sub>O in CH<sub>2</sub>Cl<sub>2</sub>-Bu<sub>4</sub>NBF<sub>4</sub> (0.2 M) at a vitreous carbon electrode,  $\nu = 0.2$  V s<sup>-1</sup>, *E*/V vs Fc

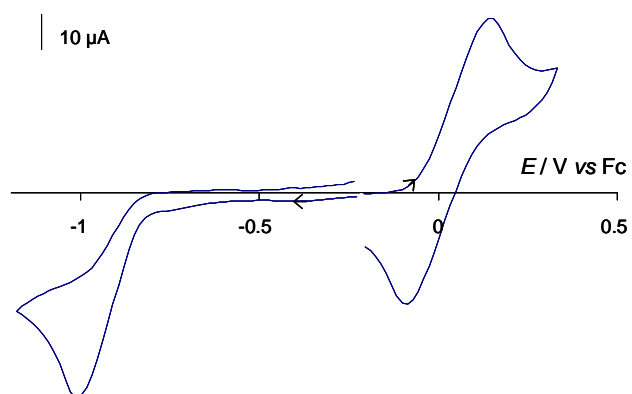

**ESI 08: 2<sup>2+</sup> CIF**

**ESI 09: 3 CIF**

**ESI 10: UV-Vis spectrum of 1 ( $10^{-4}$  mol.L<sup>-1</sup>, CH<sub>2</sub>Cl<sub>2</sub>)**

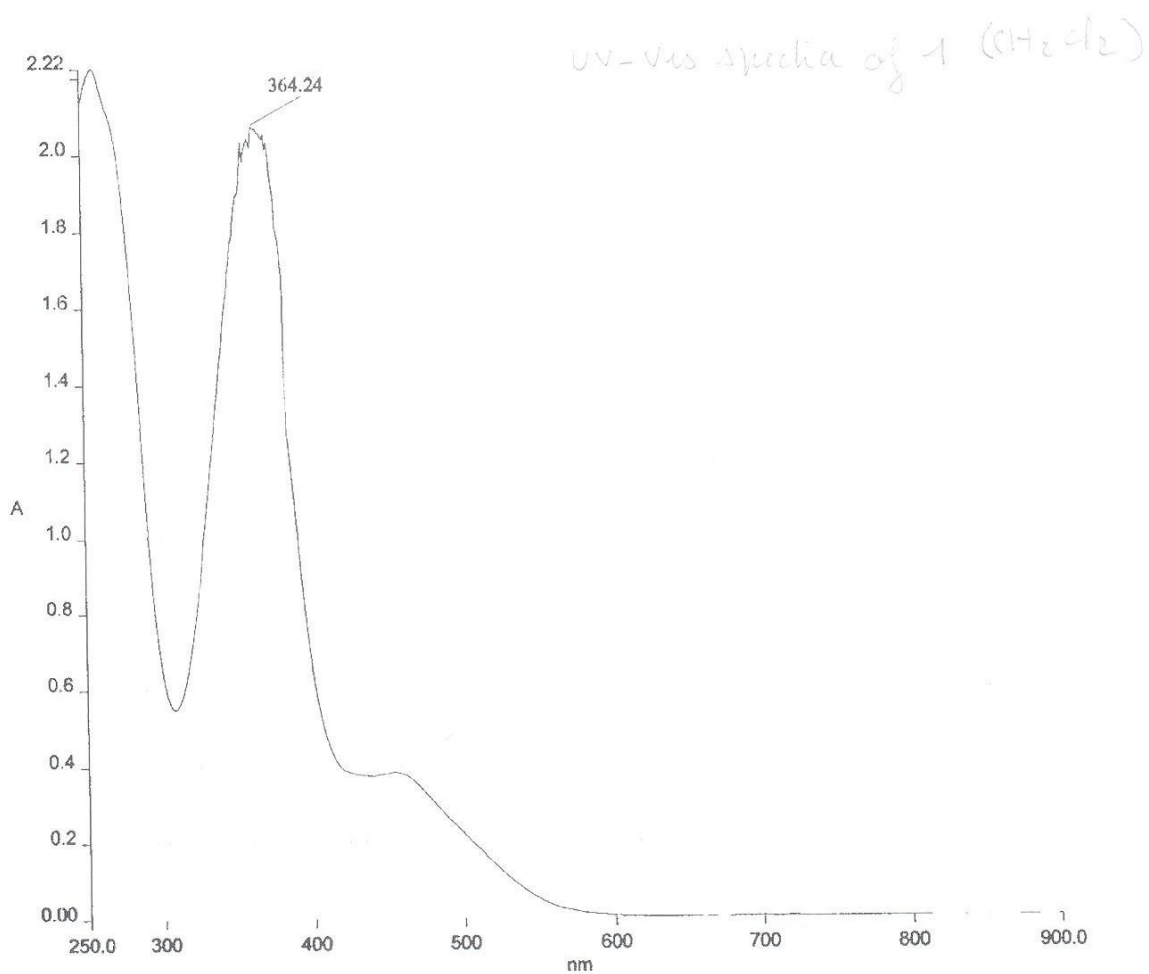

**ESI 11: UV-Vis and NIR spectra of 2<sup>2+</sup>**

**UV-Vis spectrum of 2<sup>2+</sup> (1.5 10<sup>-4</sup> mol.L<sup>-1</sup>, CH<sub>2</sub>Cl<sub>2</sub>)**

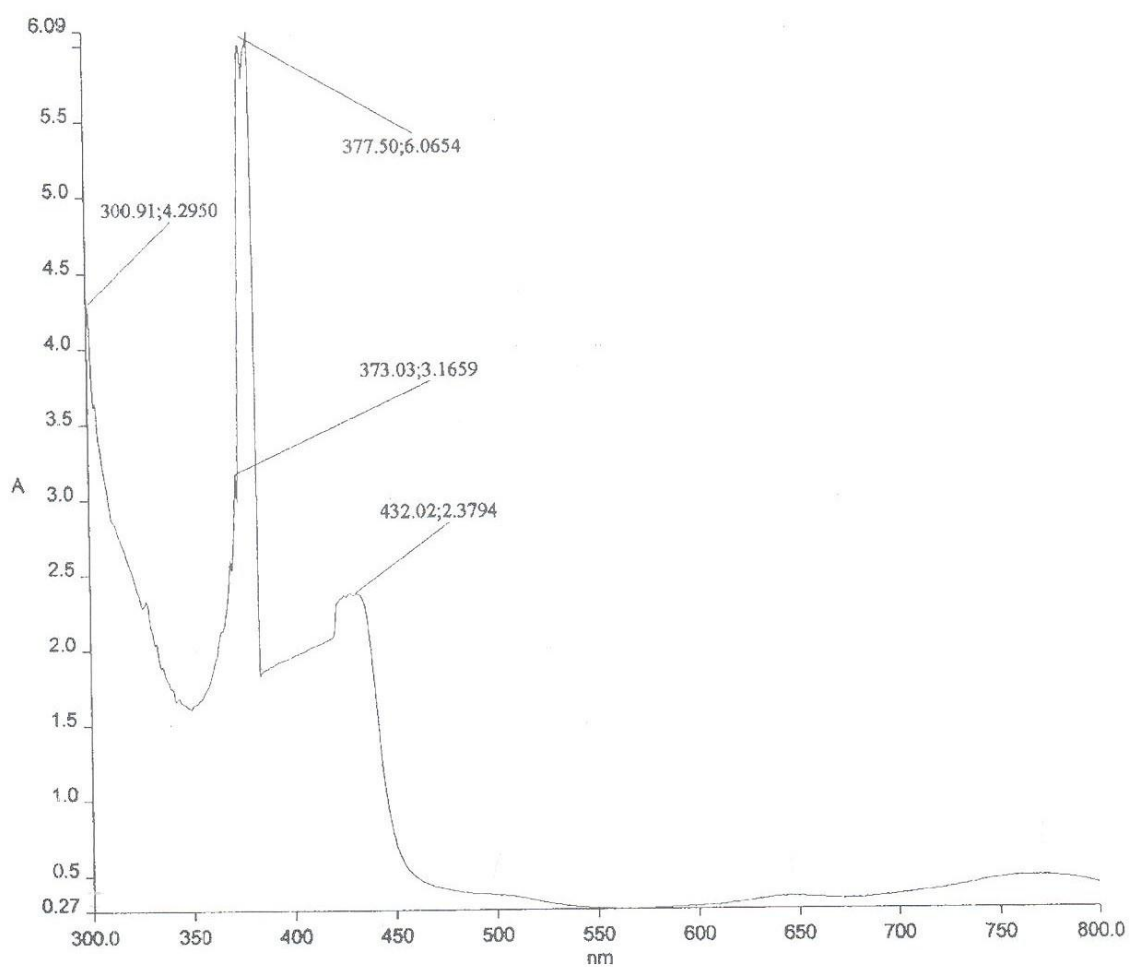

**NIR spectrum of  $2^{2+}$  ( $3 \cdot 10^{-4}$  mol.L $^{-1}$ , CH $_2$ Cl $_2$ )**

NIR spectrum of 2<sup>2+</sup>

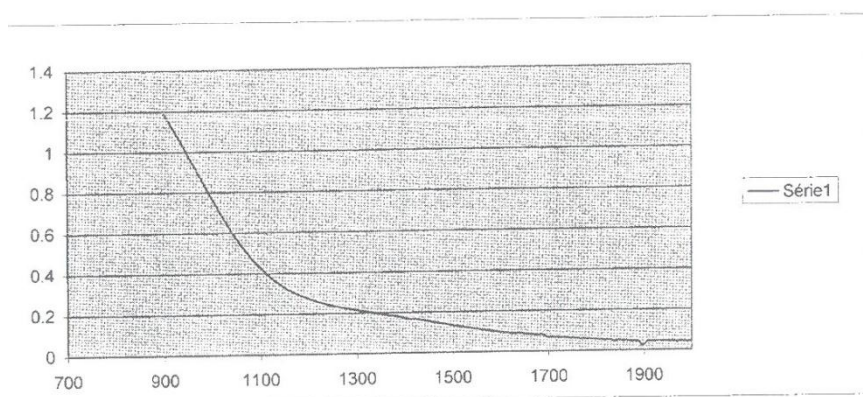

**ESI 12:** Cyclic voltammetry of  $4^{2+}$  ( $1,2 \cdot 10^{-3}$  M) in  $\text{CH}_2\text{Cl}_2$ -  $[\text{NBu}_4][\text{BF}_4]$  (0.2 M) at a Pt disk electrode,  $\nu = 0.2 \text{ V}\cdot\text{s}^{-1}$ ,  $E/\text{V}$  vs  $[\text{FcCp}_2]^{0/+}$

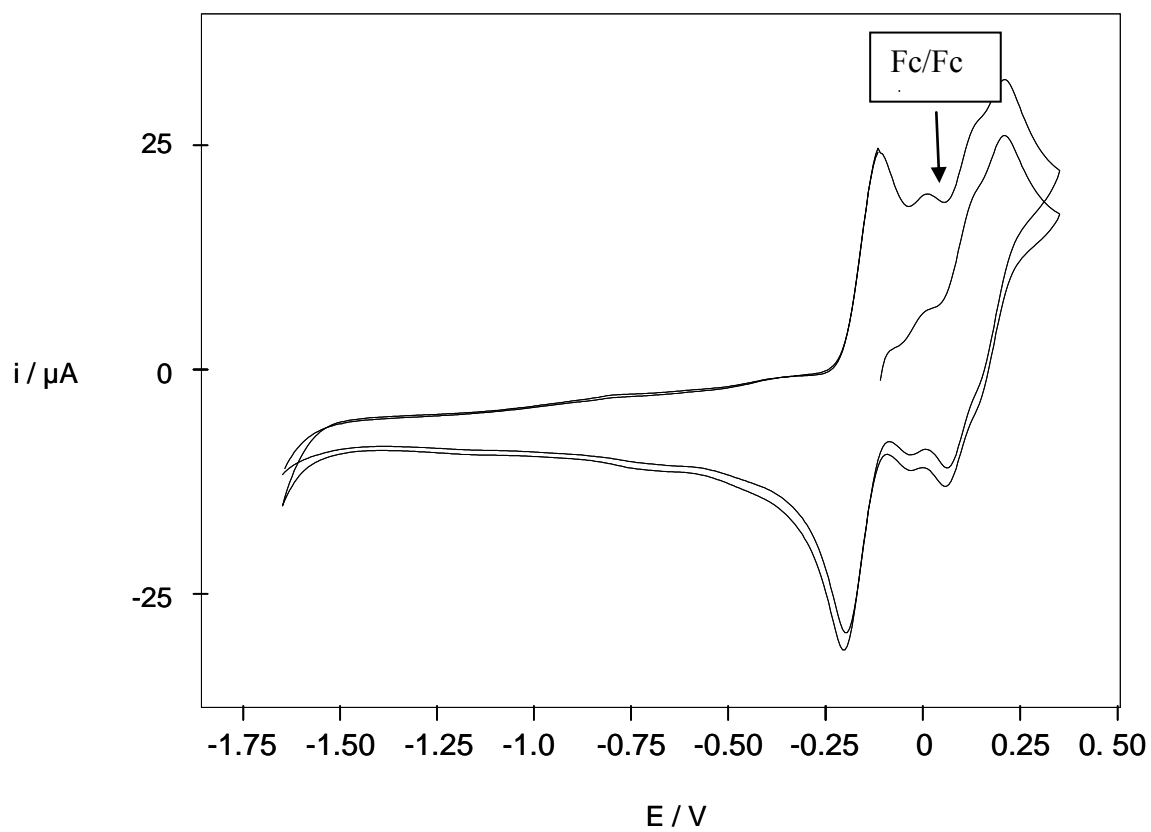

**ESI 13:**  $^1\text{H}$  NMR spectrum of  $4^{2+}$

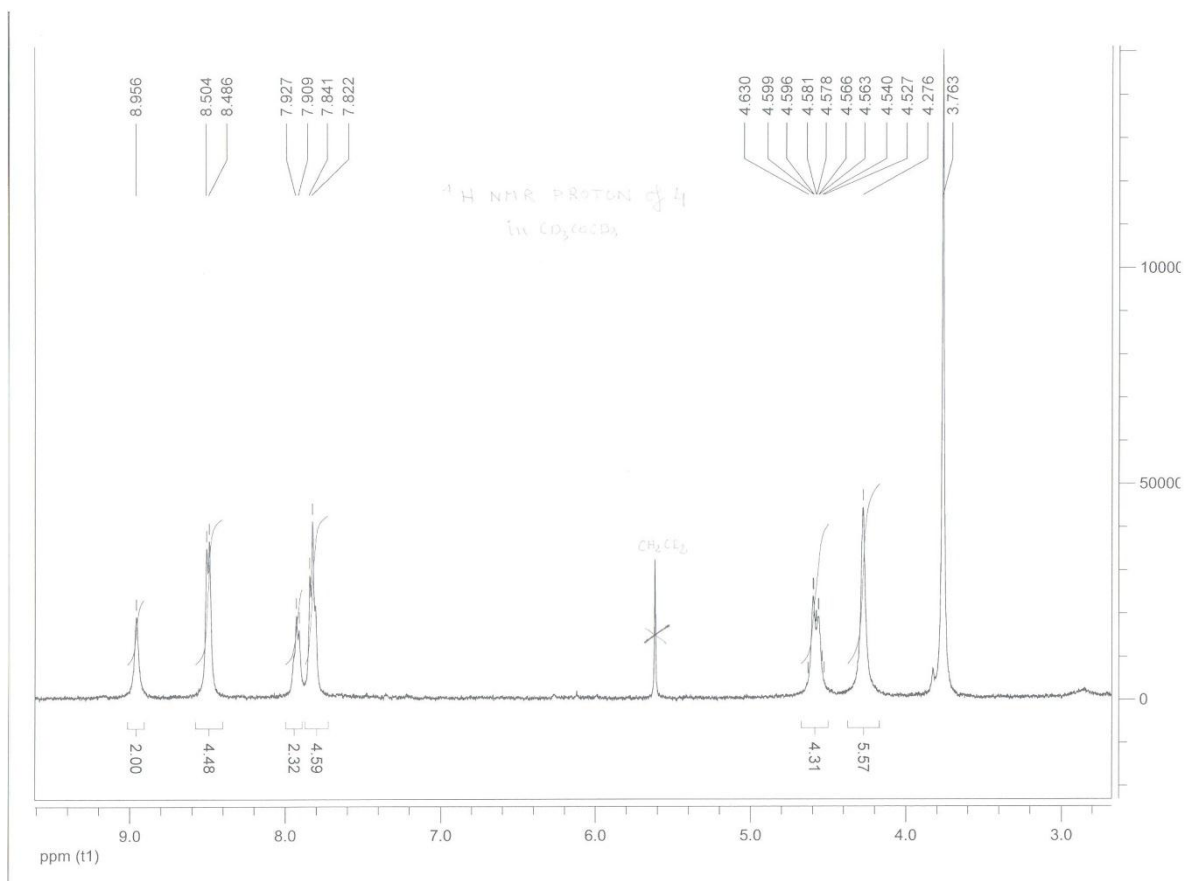

$^1\text{H}$  NMR 2D spectrum of  $4^{2+}$  (COSY)

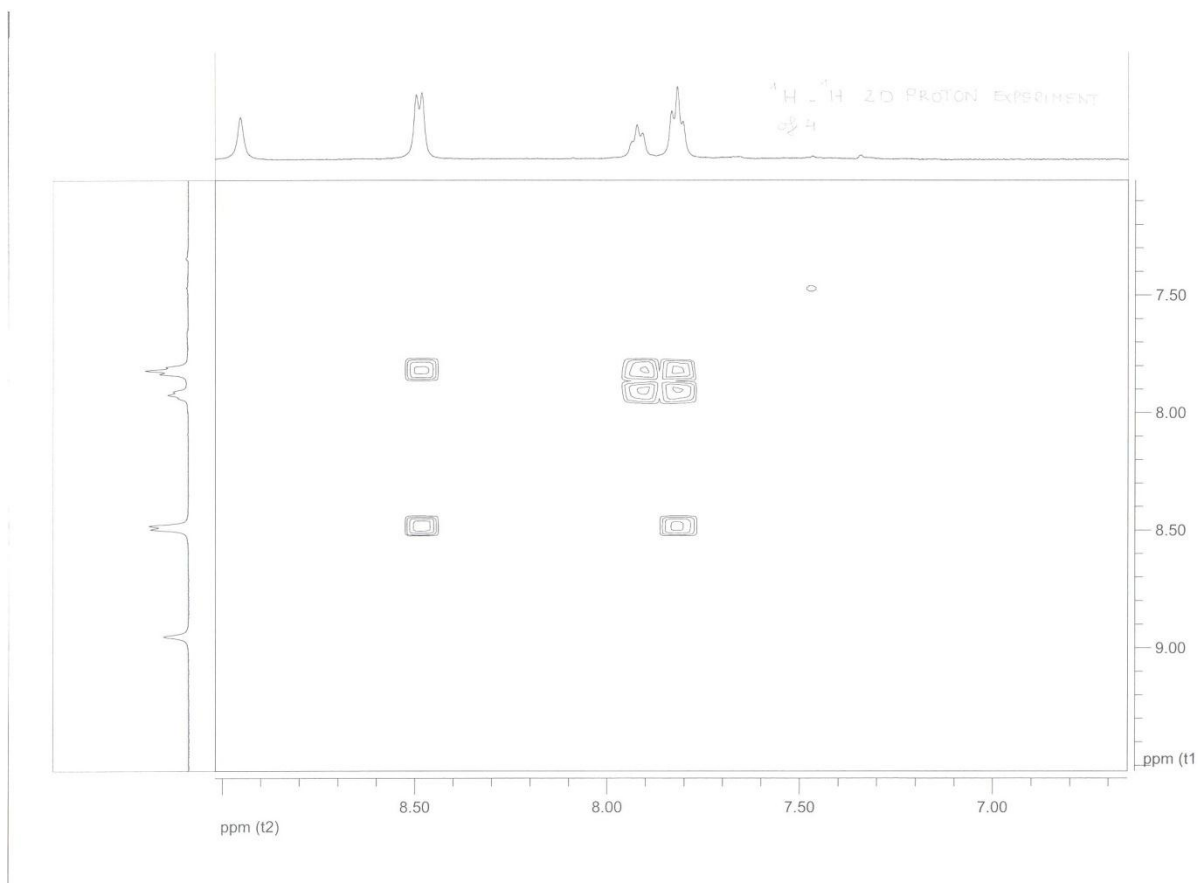

$^1\text{H}$  NMR 2D spectrum of  $4^{2+}$  (HMOC)

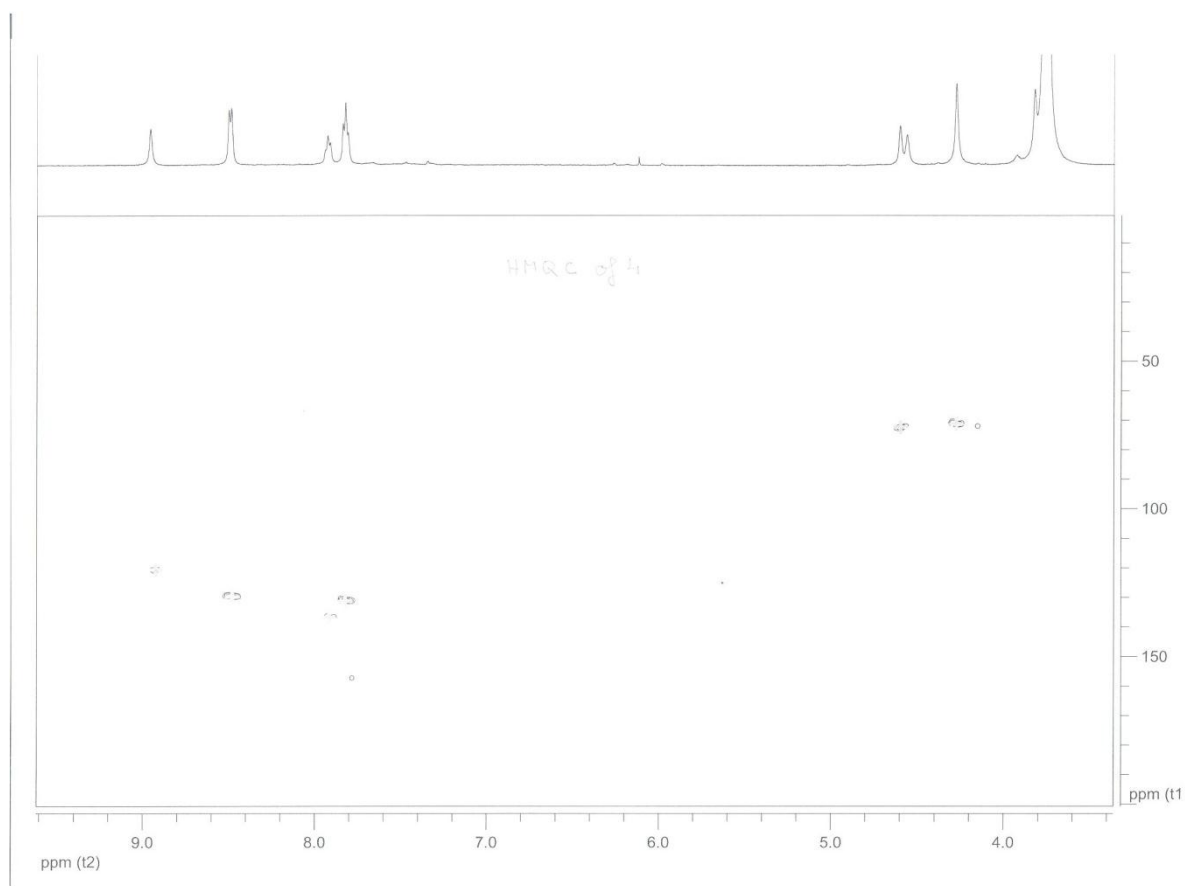



**ESI 14:  $4^{2+}$  CIF**

**ESI 15: UV-Vis spectrum of 3 ( $5 \times 10^{-5} \text{ mol.L}^{-1}$ ,  $\text{CH}_2\text{Cl}_2$ )**

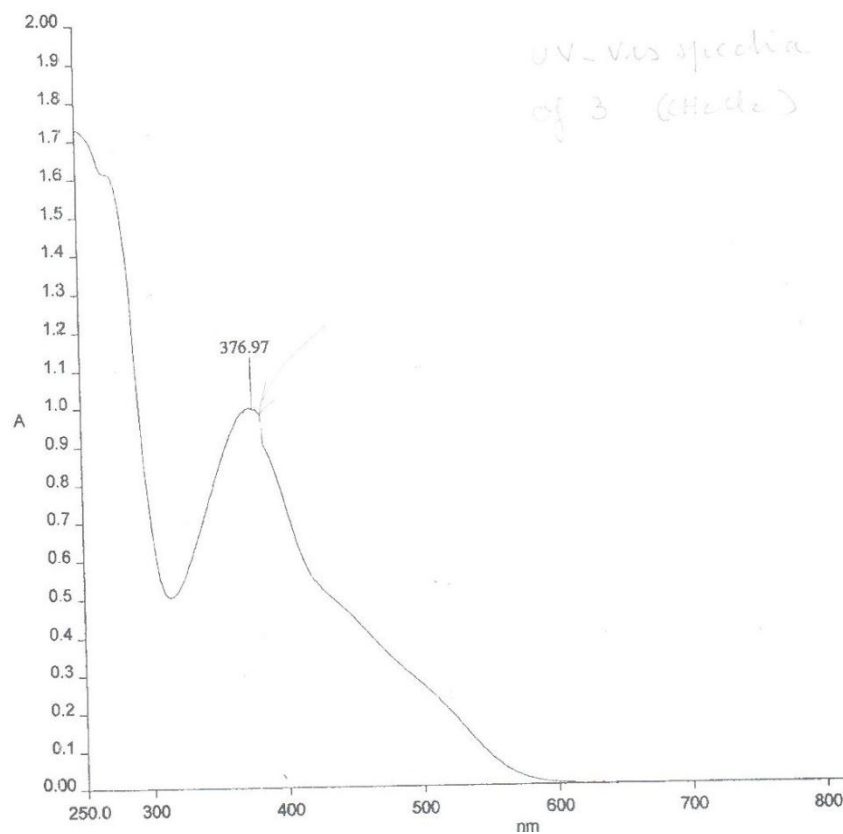

**ESI 16: UV-Vis and NIR spectra of  $4^{2+}$**

**UV-Vis spectrum of  $4^{2+}$  ( $10^{-4} \text{ mol.L}^{-1}$ ,  $\text{CH}_2\text{Cl}_2$ )**

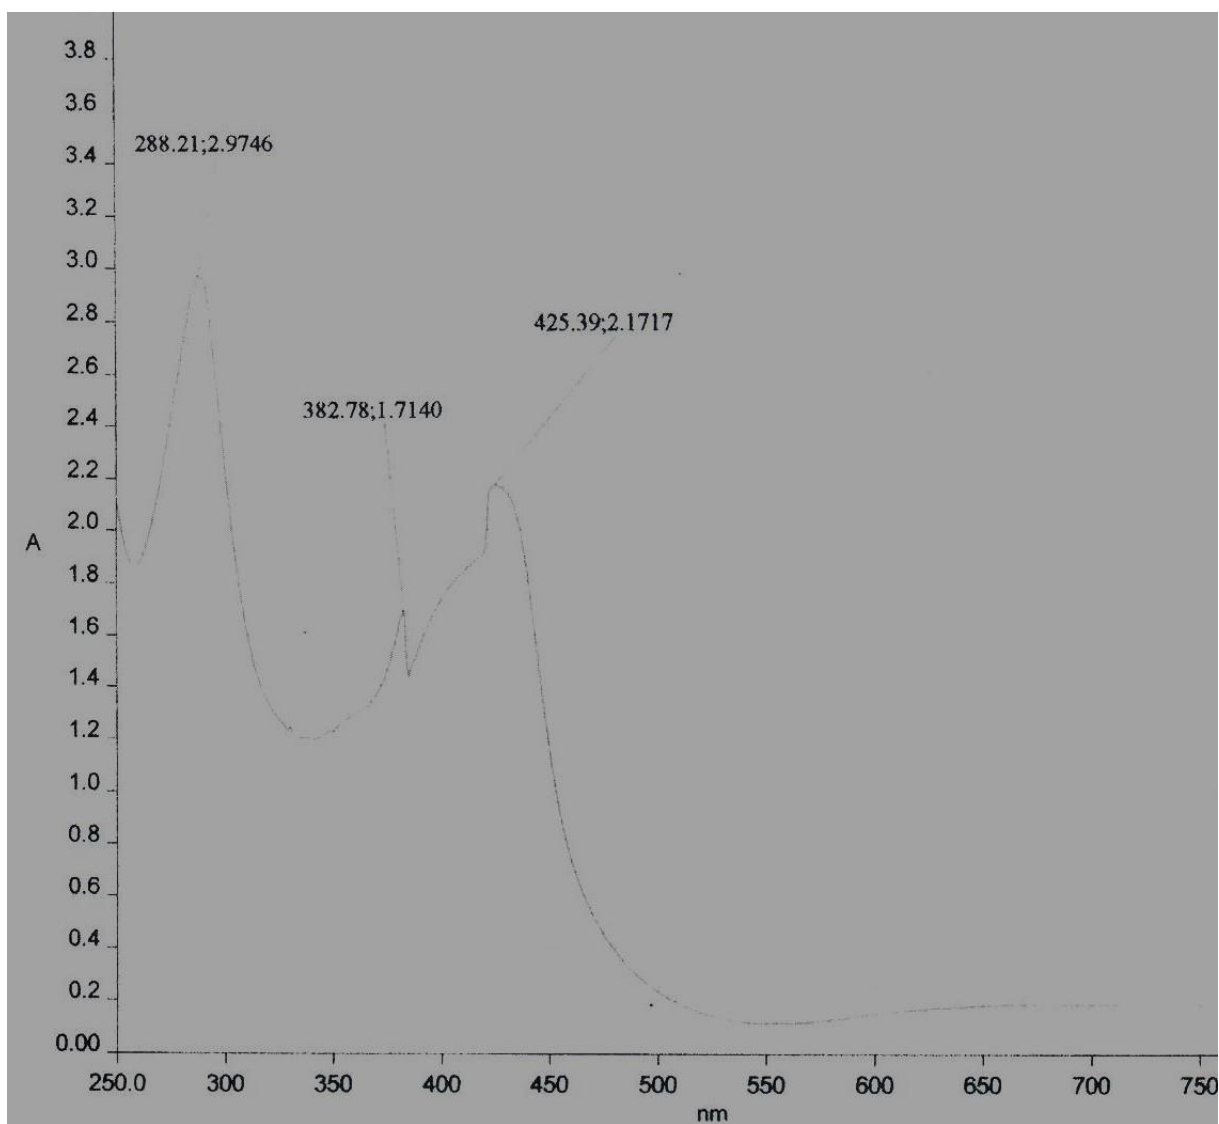

**NIR spectrum of  $4^{2+}$  ( $4 \times 10^{-4}$  mol.L<sup>-1</sup>, CH<sub>2</sub>Cl<sub>2</sub>)**

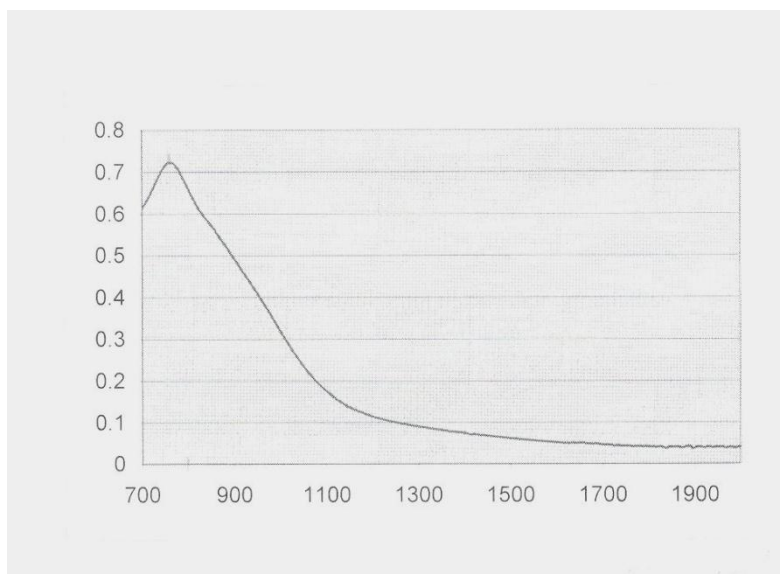



**$^1\text{H}$  NMR spectrum of 5 (3.8 ppm-5 ppm)**

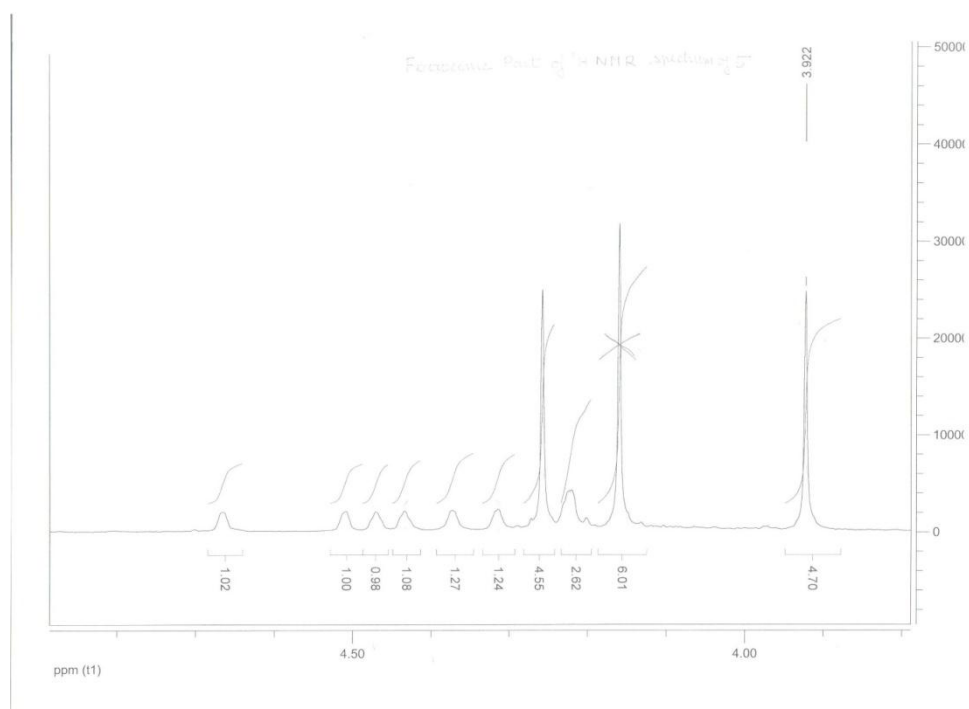

**$^1\text{H}$  NMR 2D spectrum of 5 (COSY)**

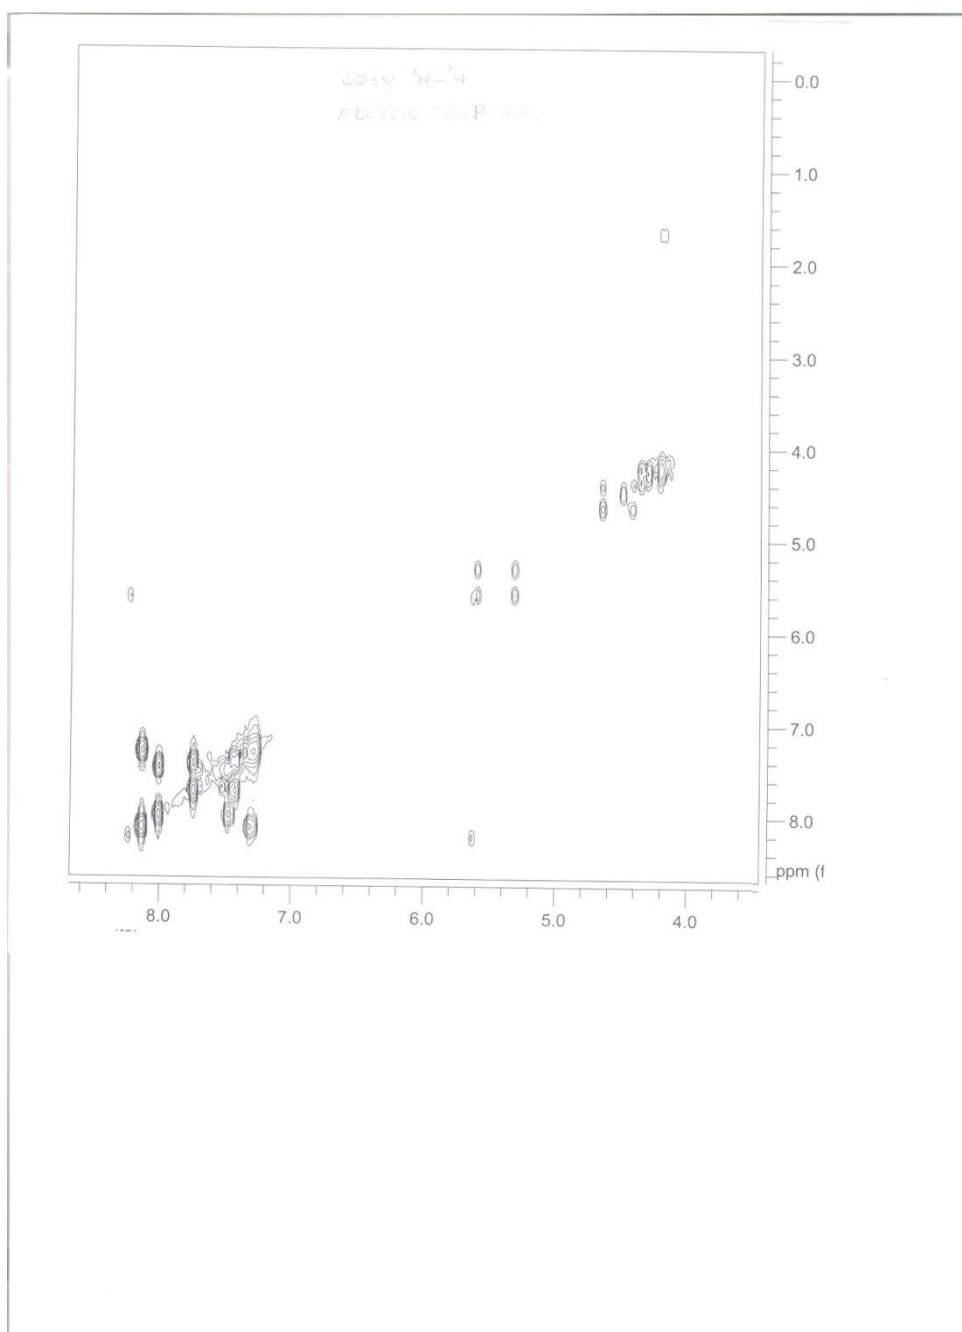

**ESI 18: IR spectrum of 5 (KBr)**

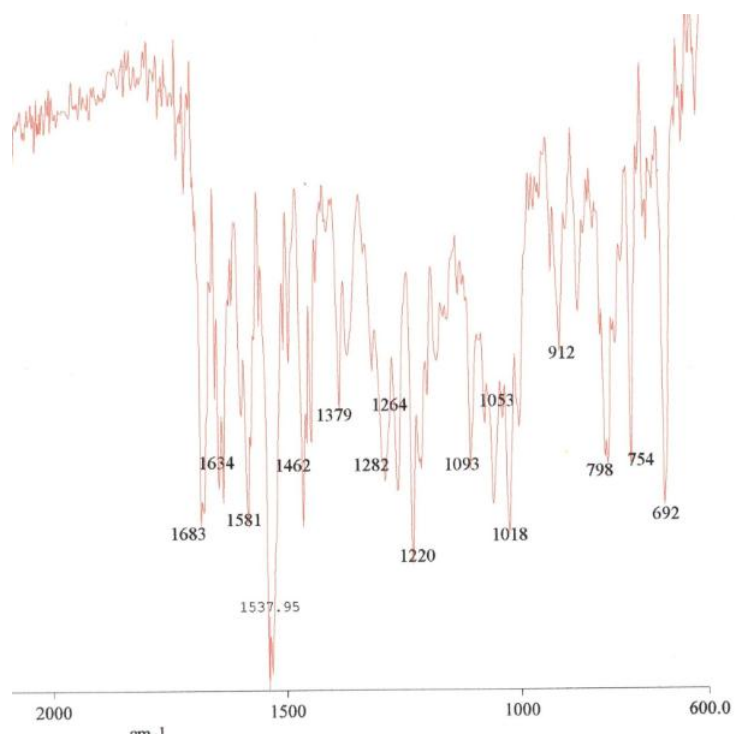

Supplement: c3nj41126e.pdf [file c3nj41126e.pdf]
